# Supplementary material for: Feruloylmonotropeins: promising natural antioxidants in Paederia scandens
Source: Royal Society of Chemistry journal article supplement (doi:10.1039/d3ra00458a), 2023-01-01
Supplement: d3ra00458a1.pdf [file d3ra00458a1.pdf]

## Supporting Information (SI)

### Feruloylmonotropeins: promising natural antioxidants in *Paederia scandens*

Nguyen Quang Trung,<sup>1,2\*</sup> Nguyen Thi Thu Thanh,<sup>3</sup> Nguyen Thi Hoa,<sup>3</sup> Adam Mechler,<sup>5</sup> Quan V. Vo<sup>4\*</sup>

<sup>1</sup>The University of Danang – University of Science and Education, Da Nang 550000, Vietnam.

<sup>2</sup>Quality assurance and Testing center 2, Da Nang 550000, Vietnam.

<sup>3</sup>Le Thanh Phuong High School, An My, Phu Yen 621640, Vietnam

<sup>4</sup>The University of Danang – University of Technology and Education, Danang 550000, Vietnam.

<sup>5</sup>Department of Biochemistry and Chemistry, La Trobe University, Victoria 3086, Australia.

\*Corresponding authors: [nqtrung.quatest2@gmail.com](mailto:nqtrung.quatest2@gmail.com); [vvquan@ute.udn.vn](mailto:vvquan@ute.udn.vn);

### Table of Contents

|                                                                                                                                                       |     |
|-------------------------------------------------------------------------------------------------------------------------------------------------------|-----|
| Table S1. The method to calculate rate constant following the conventional transition state theory .....                                              | S2  |
| Table S2: The Cartesian coordinates and energies of FMT, ANION, DIANION, TSs in the studied media (G: gas phase; P: pentyl ethanoate; H: water) ..... | S3  |
| References .....                                                                                                                                      | S25 |

**Table S1.** The method to calculate rate constant following the conventional transition state theory

The rate constant ( $k$ ) was calculated by using the conventional transition state theory (TST) (at 298.15 K, 1M standard state) according to the equation (1):<sup>1-5</sup>

$$k = \sigma \kappa \frac{k_B T}{h} e^{-(\Delta G^\ddagger)/RT} \quad (1)$$

Where:  $\sigma$  is the reaction symmetry number,<sup>6,7</sup>

$\kappa$  contains the tunneling corrections calculated using the Eckart barrier,<sup>8</sup>

$k_B$  is the Boltzmann constant,

$h$  is the Planck constant,

$\Delta G^\ddagger$  is the Gibbs free energy of activation.

The Marcus Theory was used to estimate the reaction barriers of SET reactions.<sup>9-12</sup> The free energy of reaction  $\Delta G^\ddagger$  for the SET pathway was computed following the equations (2,3).

$$\Delta G_{\text{SET}}^\ddagger = \frac{\lambda}{4} \left( 1 + \frac{\Delta G_{\text{SET}}^0}{\lambda} \right)^2 \quad (2)$$

$$\lambda \approx \Delta E_{\text{SET}} - \Delta G_{\text{SET}}^0 \quad (3)$$

where  $\Delta G_{\text{SET}}$  is the Gibbs energy of reaction,  $\Delta E_{\text{SET}}$  is the non-adiabatic energy difference between reactants and vertical products for SET.<sup>13,14</sup>

For rate constants that were close to the diffusion limit a correction was applied to yield realistic results<sup>15</sup>. The apparent rate constants ( $k_{\text{app}}$ ) were calculated following the Collins–Kimball theory in the solvents at 298.15K;<sup>16</sup> the steady-state Smoluchowski rate constant ( $k_D$ ) for an irreversible bimolecular diffusion–controlled reaction was calculated following the literature as corroding to equations (4,5).<sup>15,17</sup>

$$k_{\text{app}} = \frac{k_{\text{TST}} k_D}{k_{\text{TST}} + k_D} \quad (4)$$

$$k_D = 4\pi R_{AB} D_{AB} N_A \quad (5)$$

where  $R_{AB}$  is the reaction distance,  $N_A$  is the Avogadro constant, and  $D_{AB} = D_A + D_B$  ( $D_{AB}$  is the mutual diffusion coefficient of the reactants A and B),<sup>16,18</sup> where  $D_A$  or  $D_B$  is estimated using the Stokes–Einstein formulation (6).<sup>19,20</sup>

$$D_{A \text{ or } B} = \frac{k_B T}{6\pi\eta a_{A \text{ or } B}} \quad (6)$$

$\eta$  is the viscosity of the solvents (i.e.  $\eta(\text{H}_2\text{O}) = 8.91 \times 10^{-4}$  Pa s,  $\eta(\text{pentyl ethanoate}) = 8.62 \times 10^{-4}$  Pa s) and  $a$  is the radius of the solute.

The kinetic study requires different considerations. Water and pentyl ethanoate are the *de facto* standard solvents in the literature to mimic the polar and nonpolar environments in the human body.<sup>15,21-23</sup> Thus, these solvents were used to model the physiological environments. The solvent cage effects were included following the corrections proposed by Okuno,<sup>24</sup> adjusted with the free volume theory according to the Benson correction<sup>15,25-27</sup> to reduce over-penalizing entropy losses in solution. For the species that have multiple conformers, all of these were investigated and the conformer with the lowest electronic energy was included in the analysis.<sup>22,23</sup> The hindered internal rotation treatment was also applied to the single bonds to ensure that the obtained conformer has the lowest electronic energy.<sup>23,28</sup> All transition states were characterized by the existence of only one single imaginary frequency. Intrinsic coordinate calculations (IRCs) were performed to ensure that each transition state is connected correctly with the pre-complex and post-complex. The kinetic calculations were performed by the *Eyringpy* code<sup>29,30</sup>

**Table S2: The Cartesian coordinates and energies of FMT, ANION, DIANION, TSs in the studied media (G: gas phase; P: pentyl ethanoate; H: water)**

| Name                  |             |             |             | 6-FMT-G                                      |                             |
|-----------------------|-------------|-------------|-------------|----------------------------------------------|-----------------------------|
| Cartesian Coordinates |             |             |             | Energy                                       |                             |
| C                     | 3.23396500  | -1.79783900 | 0.63228400  | Zero-point correction=                       | 0.564368 (Hartree/Particle) |
| C                     | 1.81284900  | -2.33312700 | 0.29583200  | Thermal correction to Energy=                | 0.601146                    |
| C                     | 2.08366000  | -3.76379500 | -0.13015200 | Thermal correction to Enthalpy=              | 0.602090                    |
| C                     | 3.38426900  | -4.03953400 | -0.22351400 | Thermal correction to Gibbs Free Energy=     | 0.494663                    |
| C                     | 4.25453400  | -2.85987600 | 0.13068000  | Sum of electronic and zero-point Energies=   | -2060.607379                |
| C                     | 3.46281300  | -0.41671000 | 0.04954000  | Sum of electronic and thermal Energies=      | -2060.570601                |
| O                     | 3.12949100  | -0.37268400 | -1.34608300 | Sum of electronic and thermal Enthalpies=    | -2060.569656                |
| C                     | 1.84842900  | -0.72907800 | -1.60286900 | Sum of electronic and thermal Free Energies= | -2060.677083                |
| C                     | 1.14999600  | -1.56421700 | -0.82417200 |                                              |                             |
| O                     | 2.64080700  | 0.45427000  | 0.77736700  |                                              |                             |
| C                     | 2.32984800  | 2.66930600  | 1.51957800  |                                              |                             |
| C                     | 2.52567700  | 1.76001500  | 0.31272000  |                                              |                             |
| O                     | 1.38859200  | 1.80136600  | -0.53918000 |                                              |                             |
| C                     | 1.05754200  | 3.09639300  | -1.01918800 |                                              |                             |
| C                     | 0.71195700  | 4.00214000  | 0.16701300  |                                              |                             |
| C                     | 1.93171600  | 4.06459000  | 1.06855400  |                                              |                             |
| O                     | 3.54304900  | 2.69184400  | 2.23287600  |                                              |                             |
| O                     | 1.69434300  | 4.82206600  | 2.23442400  |                                              |                             |
| O                     | 0.41721500  | 5.32017600  | -0.23047800 |                                              |                             |
| C                     | -0.06200200 | 2.92765200  | -2.02963800 |                                              |                             |
| O                     | -1.19711700 | 2.27126100  | -1.45869400 |                                              |                             |
| C                     | 5.30056800  | -3.17874100 | 1.19854700  |                                              |                             |
| O                     | 5.04375600  | -2.42567500 | -0.97913800 |                                              |                             |
| O                     | 6.23659300  | -4.12008100 | 0.73369100  |                                              |                             |
| C                     | -2.18217100 | 3.05725000  | -0.94855100 |                                              |                             |
| C                     | -3.32973900 | 2.31902100  | -0.42085100 |                                              |                             |
| C                     | -3.40409300 | 0.97556600  | -0.47390100 |                                              |                             |
| C                     | -4.45466300 | 0.10383100  | 0.03347500  |                                              |                             |
| O                     | -2.09003800 | 4.27287600  | -0.93169500 |                                              |                             |
| C                     | -5.66378600 | 0.56614700  | 0.56441200  |                                              |                             |
| C                     | -6.61493200 | -0.33067900 | 1.03818000  |                                              |                             |
| C                     | -6.36500700 | -1.69786800 | 0.98929300  |                                              |                             |
| C                     | -5.15144200 | -2.17513200 | 0.45815300  |                                              |                             |
| C                     | -4.20682800 | -1.28341500 | -0.02003400 |                                              |                             |
| O                     | -7.28781100 | -2.57071100 | 1.45039100  |                                              |                             |
| O                     | -5.03546800 | -3.53259500 | 0.47163000  |                                              |                             |
| C                     | -3.81542300 | -4.08200300 | -0.00821700 |                                              |                             |
| C                     | -0.28920900 | -1.77260200 | -1.07591100 |                                              |                             |
| O                     | -0.89562900 | -2.77561700 | -0.77699900 |                                              |                             |
| O                     | -0.94633300 | -0.74009700 | -1.65923600 |                                              |                             |
| H                     | 3.32985200  | -1.69814800 | 1.71906800  |                                              |                             |
| H                     | 1.16043700  | -2.30551700 | 1.17557000  |                                              |                             |
| H                     | 1.26563100  | -4.44292200 | -0.34886800 |                                              |                             |
| H                     | 3.82205500  | -4.98622500 | -0.52486000 |                                              |                             |
| H                     | 4.50878300  | -0.09882600 | 0.07865600  |                                              |                             |
| H                     | 1.46084900  | -0.25344900 | -2.49889400 |                                              |                             |
| H                     | 1.51823400  | 2.24430100  | 2.13001700  |                                              |                             |
| H                     | 3.42478700  | 2.05760500  | -0.25349800 |                                              |                             |
| H                     | 1.91452100  | 3.53878700  | -1.55715600 |                                              |                             |

|                              |             |             |             |                                                           |
|------------------------------|-------------|-------------|-------------|-----------------------------------------------------------|
| H                            | -0.12314100 | 3.56042800  | 0.73115400  |                                                           |
| H                            | 2.76547000  | 4.50757500  | 0.49640900  |                                                           |
| H                            | 3.46289200  | 3.37485600  | 2.91765300  |                                                           |
| H                            | 1.33642400  | 5.68035100  | 1.95517900  |                                                           |
| H                            | -0.51504800 | 5.33655500  | -0.51518700 |                                                           |
| H                            | 0.27242600  | 2.27266300  | -2.83887000 |                                                           |
| H                            | -0.35146400 | 3.89633100  | -2.44356800 |                                                           |
| H                            | 5.79378700  | -2.23965500 | 1.49848500  |                                                           |
| H                            | 4.81366200  | -3.61338400 | 2.07597800  |                                                           |
| H                            | 4.46697500  | -2.24169900 | -1.73639400 |                                                           |
| H                            | 6.57132800  | -3.78786000 | -0.11468300 |                                                           |
| H                            | -4.09109900 | 2.94983900  | 0.02576600  |                                                           |
| H                            | -2.58233400 | 0.44522600  | -0.94320900 |                                                           |
| H                            | -5.87237400 | 1.63101200  | 0.60289500  |                                                           |
| H                            | -7.56043700 | 0.00757700  | 1.44937900  |                                                           |
| H                            | -3.26618300 | -1.64065600 | -0.43352700 |                                                           |
| H                            | -6.93843000 | -3.47092200 | 1.33475000  |                                                           |
| H                            | -3.91258100 | -5.16188400 | 0.09699500  |                                                           |
| H                            | -3.65726000 | -3.82023700 | -1.05947300 |                                                           |
| H                            | -2.96696000 | -3.71889200 | 0.57970000  |                                                           |
| H                            | -0.47357200 | 0.10221200  | -1.51805000 |                                                           |
| <b>Name</b>                  |             |             |             | <b>10-FMT-G</b>                                           |
| <b>Cartesian Coordinates</b> |             |             |             | <b>Energy</b>                                             |
| C                            | -2.78418700 | 0.56122800  | -0.53206600 | Zero-point correction= 0.565120 (Hartree/Particle)        |
| C                            | -4.11214400 | -0.00116600 | -1.09802800 | Thermal correction to Energy= 0.601579                    |
| C                            | -5.16963700 | 0.89948200  | -0.49936200 | Thermal correction to Enthalpy= 0.602523                  |
| C                            | -4.63985100 | 1.97579800  | 0.07600400  | Thermal correction to Gibbs Free Energy= 0.497076         |
| C                            | -3.12749200 | 1.96487800  | 0.07483600  | Sum of electronic and zero-point Energies= -2060.611523   |
| C                            | -2.17279600 | -0.31823500 | 0.54534700  | Sum of electronic and thermal Energies= -2060.575063      |
| O                            | -2.10527400 | -1.69633700 | 0.13456700  | Sum of electronic and thermal Enthalpies= -2060.574119    |
| C                            | -3.23988400 | -2.21539200 | -0.36421700 | Sum of electronic and thermal Free Energies= -2060.679566 |
| C                            | -4.24623800 | -1.48616300 | -0.87479900 |                                                           |
| O                            | -0.86060500 | 0.09499800  | 0.74353800  |                                                           |
| C                            | 0.94250900  | 0.74777900  | 2.15796100  |                                                           |
| C                            | -0.36998000 | -0.05072800 | 2.07652300  |                                                           |
| O                            | -0.26891200 | -1.39109600 | 2.45282400  |                                                           |
| C                            | 0.90356700  | -2.17239300 | 2.17516000  |                                                           |
| C                            | 2.18630700  | -1.33770600 | 2.13242300  |                                                           |
| C                            | 1.98707900  | -0.05363100 | 2.91041800  |                                                           |
| O                            | 0.78397900  | 1.98364700  | 2.82358700  |                                                           |
| O                            | 3.22520000  | 0.62330700  | 2.93434400  |                                                           |
| O                            | 3.22672900  | -2.13671800 | 2.65748000  |                                                           |
| C                            | 0.72121000  | -3.02325600 | 0.92638100  |                                                           |
| O                            | 0.71783200  | -2.26363300 | -0.26722700 |                                                           |
| C                            | -2.55403200 | 3.07133600  | -0.81718000 |                                                           |
| O                            | -2.70848400 | 2.11215500  | 1.42239000  |                                                           |
| O                            | -1.17662000 | 2.83438100  | -1.17139900 |                                                           |
| C                            | -0.22505000 | 3.14523500  | -0.29142100 |                                                           |
| C                            | 1.13655200  | 2.79756200  | -0.71296600 |                                                           |
| C                            | 1.40508200  | 1.66148300  | -1.37948700 |                                                           |
| O                            | -0.46856200 | 3.65544700  | 0.79828800  |                                                           |
| C                            | 2.75477200  | 1.16651900  | -1.65714900 |                                                           |
| C                            | 3.81266300  | 2.03861200  | -1.92902900 |                                                           |
| C                            | 5.09477500  | 1.54667100  | -2.15778500 |                                                           |

|                       |             |             |             |                                                           |
|-----------------------|-------------|-------------|-------------|-----------------------------------------------------------|
| C                     | 5.33078200  | 0.17993500  | -2.09344500 |                                                           |
| C                     | 4.27259000  | -0.70503200 | -1.80876300 |                                                           |
| C                     | 2.98914600  | -0.22164700 | -1.61005000 |                                                           |
| O                     | 6.57515900  | -0.30414600 | -2.30628900 |                                                           |
| H                     | -2.02982100 | 0.64132900  | -1.32103300 |                                                           |
| H                     | -4.12498300 | 0.15163000  | -2.18808300 |                                                           |
| H                     | -6.22863200 | 0.68720200  | -0.60139400 |                                                           |
| H                     | -5.18288600 | 2.78405900  | 0.55633300  |                                                           |
| H                     | -2.75026200 | -0.29366900 | 1.47693800  |                                                           |
| H                     | -3.26444600 | -3.30054700 | -0.33392400 |                                                           |
| H                     | 1.32047700  | 0.90497700  | 1.13990500  |                                                           |
| H                     | -1.10672900 | 0.38686200  | 2.75906200  |                                                           |
| H                     | 0.99100100  | -2.84313300 | 3.03788300  |                                                           |
| H                     | 2.42192500  | -1.05626800 | 1.09368500  |                                                           |
| H                     | 1.64566000  | -0.27043100 | 3.93453500  |                                                           |
| H                     | 0.47176800  | 2.66420600  | 2.20038800  |                                                           |
| H                     | 3.05637200  | 1.52457500  | 3.25329100  |                                                           |
| H                     | 4.00048500  | -1.55902100 | 2.76220600  |                                                           |
| H                     | -0.20386900 | -3.60612200 | 1.02034300  |                                                           |
| H                     | 1.56523700  | -3.71932300 | 0.86088000  |                                                           |
| H                     | -0.12806900 | -1.78674500 | -0.29908600 |                                                           |
| H                     | -3.07469200 | 3.07824200  | -1.77650600 |                                                           |
| H                     | -2.64602800 | 4.05069100  | -0.33715200 |                                                           |
| H                     | -1.95394500 | 2.72445100  | 1.47116800  |                                                           |
| H                     | 1.92248000  | 3.40418900  | -0.27147800 |                                                           |
| H                     | 0.57264200  | 1.01641600  | -1.66168300 |                                                           |
| H                     | 3.62789200  | 3.10708700  | -1.99330800 |                                                           |
| H                     | 5.92475200  | 2.20707200  | -2.38681600 |                                                           |
| H                     | 2.17336000  | -0.90220000 | -1.37450100 |                                                           |
| H                     | 6.54590600  | -1.27034100 | -2.19984600 |                                                           |
| C                     | -5.40215500 | -2.24309200 | -1.38781800 |                                                           |
| O                     | -5.59005000 | -3.43283200 | -1.26577900 |                                                           |
| O                     | -6.27468200 | -1.44600200 | -2.05020000 |                                                           |
| H                     | -6.99453200 | -2.01935500 | -2.36641000 |                                                           |
| O                     | 4.64822800  | -2.01483800 | -1.76368800 |                                                           |
| C                     | 3.70785300  | -2.94301800 | -1.24074500 |                                                           |
| H                     | 2.80514200  | -2.98376800 | -1.85799500 |                                                           |
| H                     | 4.20917100  | -3.91040500 | -1.24598600 |                                                           |
| H                     | 3.43447500  | -2.66866400 | -0.21537400 |                                                           |
| <b>Name</b>           |             |             |             | <b>6-FMT-C5-H-OOH-G</b>                                   |
| Cartesian Coordinates |             |             |             | Energy                                                    |
| C                     | 3.14031100  | -1.53118100 | 0.27097900  | Zero-point correction= 0.575080 (Hartree/Particle)        |
| C                     | 1.80964400  | -2.09040500 | -0.25030200 | Thermal correction to Energy= 0.615289                    |
| C                     | 2.10719700  | -3.48729200 | -0.65776200 | Thermal correction to Enthalpy= 0.616234                  |
| C                     | 3.41762400  | -3.76120800 | -0.56959400 | Thermal correction to Gibbs Free Energy= 0.500323         |
| C                     | 4.22606500  | -2.55448700 | -0.15038100 | Sum of electronic and zero-point Energies= -2211.414574   |
| C                     | 3.36724700  | -0.10521100 | -0.19813800 | Sum of electronic and thermal Energies= -2211.374364      |
| O                     | 3.03773000  | 0.05965500  | -1.58806500 | Sum of electronic and thermal Enthalpies= -2211.373420    |
| C                     | 1.76611000  | -0.28192600 | -1.88602900 | Sum of electronic and thermal Free Energies= -2211.489331 |
| C                     | 1.09046900  | -1.24097600 | -1.22918700 |                                                           |
| O                     | 2.53222300  | 0.69021100  | 0.59441100  |                                                           |
| C                     | 2.17473800  | 2.82836700  | 1.51192300  |                                                           |
| C                     | 2.37881100  | 2.02522200  | 0.23373700  |                                                           |
| O                     | 1.23112900  | 2.09503700  | -0.60207300 |                                                           |

|   |             |             |             |
|---|-------------|-------------|-------------|
| C | 0.83083700  | 3.40946000  | -0.96107500 |
| C | 0.47320300  | 4.19399100  | 0.30532100  |
| C | 1.71033200  | 4.23732600  | 1.18374900  |
| O | 3.40537800  | 2.84418400  | 2.19515000  |
| O | 1.46865700  | 4.88792300  | 2.41127900  |
| O | 0.10898800  | 5.52517000  | 0.02647900  |
| C | -0.30495600 | 3.27310600  | -1.95884300 |
| O | -1.39160600 | 2.51252600  | -1.42358700 |
| C | 5.21359700  | -2.84121800 | 0.97643900  |
| O | 5.05187100  | -2.08993900 | -1.22157500 |
| O | 6.18971400  | -3.77186500 | 0.57286200  |
| C | -2.39667900 | 3.20185200  | -0.81888800 |
| C | -3.48456000 | 2.36454100  | -0.31396500 |
| C | -3.49413600 | 1.02746800  | -0.47207100 |
| C | -4.47161300 | 0.06225200  | 0.01035800  |
| O | -2.36387200 | 4.41514500  | -0.70538900 |
| C | -5.67867700 | 0.41325600  | 0.62456400  |
| C | -6.55181600 | -0.56995400 | 1.07651900  |
| C | -6.22361100 | -1.91295700 | 0.92516800  |
| C | -5.01130700 | -2.27836900 | 0.30937000  |
| C | -4.14705700 | -1.30032300 | -0.15083800 |
| O | -7.06898300 | -2.86963300 | 1.36792000  |
| O | -4.81202200 | -3.62371200 | 0.22852500  |
| C | -3.57593400 | -4.06132800 | -0.32050200 |
| C | -0.33113200 | -1.49873000 | -1.53978400 |
| O | -0.87115300 | -2.57064900 | -1.40011900 |
| O | -1.03871700 | -0.43626900 | -1.99049300 |
| H | 3.10149700  | -1.49731700 | 1.36799800  |
| H | 1.32613800  | -4.15982100 | -0.99893000 |
| H | 3.89919100  | -4.70244500 | -0.81706300 |
| H | 4.41090700  | 0.21612500  | -0.13800300 |
| H | 1.36508900  | 0.28771100  | -2.71922000 |
| H | 1.39759700  | 2.32136200  | 2.10388500  |
| H | 3.26262200  | 2.39159300  | -0.31579900 |
| H | 1.65283400  | 3.93681800  | -1.47657700 |
| H | -0.32677900 | 3.66735900  | 0.84680800  |
| H | 2.51159400  | 4.76012300  | 0.63286600  |
| H | 3.30850400  | 3.44286400  | 2.95259900  |
| H | 1.06411900  | 5.74724600  | 2.20975300  |
| H | -0.83067600 | 5.52154200  | -0.23286800 |
| H | 0.03925200  | 2.70946200  | -2.83045600 |
| H | -0.65183200 | 4.25824600  | -2.27903700 |
| H | 5.67253900  | -1.89147400 | 1.29439700  |
| H | 4.68294800  | -3.27286600 | 1.82925000  |
| H | 4.51181400  | -1.96153400 | -2.01691400 |
| H | 6.59159600  | -3.42731000 | -0.24041100 |
| H | -4.25563800 | 2.91606800  | 0.21356400  |
| H | -2.67009100 | 0.58087500  | -1.01769600 |
| H | -5.94628200 | 1.45847400  | 0.74640200  |
| H | -7.49430400 | -0.31861400 | 1.55189900  |
| H | -3.21115000 | -1.57149300 | -0.63396800 |
| H | -6.66929100 | -3.73668300 | 1.18273000  |
| H | -3.59986000 | -5.14968400 | -0.27817100 |
| H | -3.46970600 | -3.72860300 | -1.35785900 |
| H | -2.73381400 | -3.67860900 | 0.26526700  |

|                       |             |             |             |                                                           |
|-----------------------|-------------|-------------|-------------|-----------------------------------------------------------|
| H                     | -0.62033000 | 0.40743300  | -1.73153700 |                                                           |
| O                     | 1.72566000  | -3.19391000 | 2.48232500  |                                                           |
| H                     | 1.53293200  | -4.12654400 | 2.27912800  |                                                           |
| O                     | 0.65451200  | -2.51224800 | 1.93882500  |                                                           |
| H                     | 1.06428700  | -2.22096800 | 0.81157100  |                                                           |
| <b>Name</b>           |             |             |             | <b>6-FMT-O24-H-OOH-G</b>                                  |
| Cartesian Coordinates |             |             |             | Energy                                                    |
| C                     | 3.16544700  | -2.24018100 | 0.59218700  | Zero-point correction= 0.575766 (Hartree/Particle)        |
| C                     | 1.70564400  | -2.49399100 | 0.11900700  | Thermal correction to Energy= 0.615475                    |
| C                     | 1.75794700  | -3.92441400 | -0.38384700 | Thermal correction to Enthalpy= 0.616419                  |
| C                     | 2.99364800  | -4.42348800 | -0.40017500 | Thermal correction to Gibbs Free Energy= 0.501047         |
| C                     | 4.02335300  | -3.44048300 | 0.09765800  | Sum of electronic and zero-point Energies= -2211.420636   |
| C                     | 3.67878900  | -0.89414500 | 0.11901400  | Sum of electronic and thermal Energies= -2211.380927      |
| O                     | 3.47503800  | -0.71863600 | -1.29156400 | Sum of electronic and thermal Enthalpies= -2211.379983    |
| C                     | 2.17744500  | -0.82375100 | -1.66121300 | Sum of electronic and thermal Free Energies= -2211.495355 |
| C                     | 1.28153700  | -1.55790200 | -0.98963200 |                                                           |
| O                     | 2.96097800  | 0.07040700  | 0.83945400  |                                                           |
| C                     | 2.99510600  | 2.25881100  | 1.71011100  |                                                           |
| C                     | 3.11341000  | 1.39853700  | 0.45813400  |                                                           |
| O                     | 2.06546800  | 1.69326800  | -0.45836000 |                                                           |
| C                     | 2.00336400  | 3.05276700  | -0.86407700 |                                                           |
| C                     | 1.73772700  | 3.93613800  | 0.35932900  |                                                           |
| C                     | 2.88206400  | 3.72683500  | 1.33469300  |                                                           |
| O                     | 4.13976500  | 2.02011600  | 2.49287700  |                                                           |
| O                     | 2.69757700  | 4.44411800  | 2.53449300  |                                                           |
| O                     | 1.70810600  | 5.30597000  | 0.03545600  |                                                           |
| C                     | 0.94939700  | 3.14972900  | -1.95139200 |                                                           |
| O                     | -0.32153500 | 2.66646000  | -1.50188600 |                                                           |
| C                     | 4.90077800  | -3.99969900 | 1.21742500  |                                                           |
| O                     | 4.96896500  | -3.09614500 | -0.91713400 |                                                           |
| O                     | 5.69057700  | -5.07054700 | 0.76261700  |                                                           |
| C                     | -1.19024600 | 3.57299900  | -0.99163500 |                                                           |
| C                     | -2.48553800 | 3.00651500  | -0.59496900 |                                                           |
| C                     | -2.78393400 | 1.70627400  | -0.77209200 |                                                           |
| C                     | -4.00528300 | 1.01021700  | -0.39013200 |                                                           |
| O                     | -0.90372300 | 4.74978700  | -0.86762400 |                                                           |
| C                     | -5.14349500 | 1.66528400  | 0.12757200  |                                                           |
| C                     | -6.25717700 | 0.93985000  | 0.48350500  |                                                           |
| C                     | -6.29891700 | -0.46797600 | 0.32044600  |                                                           |
| C                     | -5.12909400 | -1.12661500 | -0.18327600 |                                                           |
| C                     | -4.00928500 | -0.38634400 | -0.54086000 |                                                           |
| O                     | -7.39447900 | -1.12852600 | 0.56608500  |                                                           |
| O                     | -5.21100300 | -2.47421100 | -0.26080000 |                                                           |
| C                     | -4.15646100 | -3.16495000 | -0.93085100 |                                                           |
| C                     | -0.14661000 | -1.47839400 | -1.34824000 |                                                           |
| O                     | -0.95055300 | -2.36280600 | -1.16034800 |                                                           |
| O                     | -0.55594600 | -0.30727200 | -1.89684000 |                                                           |
| H                     | 3.18639400  | -2.21488000 | 1.68721900  |                                                           |
| H                     | 0.99779100  | -2.39882100 | 0.94976900  |                                                           |
| H                     | 0.85553600  | -4.43389300 | -0.70700300 |                                                           |
| H                     | 3.28315200  | -5.41598400 | -0.73154400 |                                                           |
| H                     | 4.75769700  | -0.76903200 | 0.24527100  |                                                           |
| H                     | 1.95359700  | -0.23972500 | -2.54911200 |                                                           |
| H                     | 2.08011300  | 1.95294300  | 2.24052500  |                                                           |

|                       |             |             |             |                                                           |
|-----------------------|-------------|-------------|-------------|-----------------------------------------------------------|
| H                     | 4.08901400  | 1.55969700  | -0.03108700 |                                                           |
| H                     | 2.96116700  | 3.36480600  | -1.31644000 |                                                           |
| H                     | 0.80054500  | 3.62035500  | 0.84157600  |                                                           |
| H                     | 3.81928700  | 4.04523700  | 0.84602700  |                                                           |
| H                     | 4.13054700  | 2.65951000  | 3.22290700  |                                                           |
| H                     | 2.52833100  | 5.37050900  | 2.29849600  |                                                           |
| H                     | 0.81420600  | 5.51112500  | -0.29293600 |                                                           |
| H                     | 1.22293300  | 2.49954400  | -2.78666100 |                                                           |
| H                     | 0.85951400  | 4.17897100  | -2.30637200 |                                                           |
| H                     | 5.52513200  | -3.18296900 | 1.61525200  |                                                           |
| H                     | 4.27096300  | -4.38289700 | 2.02511900  |                                                           |
| H                     | 4.50058200  | -2.78715400 | -1.70768400 |                                                           |
| H                     | 6.15541700  | -4.76046400 | -0.03100000 |                                                           |
| H                     | -3.15656900 | 3.72534800  | -0.13657700 |                                                           |
| H                     | -2.03868000 | 1.07240000  | -1.24069000 |                                                           |
| H                     | -5.14460400 | 2.74493000  | 0.24078400  |                                                           |
| H                     | -7.15044500 | 1.41502500  | 0.87555300  |                                                           |
| H                     | -3.12119600 | -0.87717600 | -0.93255500 |                                                           |
| H                     | -4.46420500 | -4.20928400 | -0.95644900 |                                                           |
| H                     | -4.03896300 | -2.78304200 | -1.94965700 |                                                           |
| H                     | -3.20767800 | -3.05897300 | -0.39693100 |                                                           |
| H                     | 0.05451100  | 0.41802800  | -1.66425000 |                                                           |
| O                     | -5.57296200 | -2.22435500 | 2.49946900  |                                                           |
| H                     | -5.13786500 | -2.69753500 | 1.76069500  |                                                           |
| O                     | -6.88531900 | -2.56562700 | 2.36075000  |                                                           |
| H                     | -7.23155200 | -1.95232700 | 1.37447900  |                                                           |
| <b>Name</b>           |             |             |             | <b>10-FMT-C5-H-OOH-G</b>                                  |
| Cartesian Coordinates |             |             |             | Energy                                                    |
| C                     | 2.61888400  | -0.37426900 | 0.02942400  | Zero-point correction= 0.576179 (Hartree/Particle)        |
| C                     | 3.96990800  | 0.13506300  | -0.48220600 | Thermal correction to Energy= 0.616040                    |
| C                     | 5.00122600  | -0.52731500 | 0.34363700  | Thermal correction to Enthalpy= 0.616984                  |
| C                     | 4.46469600  | -1.49550600 | 1.09913200  | Thermal correction to Gibbs Free Energy= 0.502502         |
| C                     | 2.95589800  | -1.55993100 | 0.98918400  | Sum of electronic and zero-point Energies= -2211.427619   |
| C                     | 1.84281700  | 0.71343500  | 0.74559600  | Sum of electronic and thermal Energies= -2211.387759      |
| O                     | 1.75148100  | 1.90068300  | -0.07660300 | Sum of electronic and thermal Enthalpies= -2211.386815    |
| C                     | 2.87519700  | 2.32209500  | -0.66987100 | Sum of electronic and thermal Free Energies= -2211.501296 |
| C                     | 3.98951500  | 1.57198800  | -0.82153400 |                                                           |
| O                     | 0.54064500  | 0.27697400  | 0.94124600  |                                                           |
| C                     | -1.37261900 | -0.06671500 | 2.32202000  |                                                           |
| C                     | -0.08526700 | 0.75192000  | 2.13554700  |                                                           |
| O                     | -0.26378000 | 2.13530900  | 2.11351400  |                                                           |
| C                     | -1.43656600 | 2.74189800  | 1.54655300  |                                                           |
| C                     | -2.69088700 | 1.87152600  | 1.67705200  |                                                           |
| C                     | -2.49608500 | 0.84594600  | 2.77461900  |                                                           |
| O                     | -1.22984100 | -1.08380200 | 3.29098900  |                                                           |
| O                     | -3.70658200 | 0.13335700  | 2.90673300  |                                                           |
| O                     | -3.77824200 | 2.73722000  | 1.93161600  |                                                           |
| C                     | -1.18801500 | 3.19368200  | 0.11464400  |                                                           |
| O                     | -1.07394900 | 2.11573700  | -0.79457900 |                                                           |
| C                     | 2.50037500  | -2.87986800 | 0.35837800  |                                                           |
| O                     | 2.43608200  | -1.37605300 | 2.29585200  |                                                           |
| O                     | 1.14410000  | -2.81519400 | -0.12697700 |                                                           |
| C                     | 0.14363400  | -2.95225000 | 0.73933000  |                                                           |
| C                     | -1.19622600 | -2.82723600 | 0.15530300  |                                                           |



|                       |             |             |             |                                                         |
|-----------------------|-------------|-------------|-------------|---------------------------------------------------------|
| C                     | -1.46495500 | -1.95590800 | -0.83216100 |                                                         |
| O                     | 0.32154200  | -3.13953900 | 1.94073200  |                                                         |
| C                     | -2.81171800 | -1.65727200 | -1.32338500 |                                                         |
| C                     | -3.80175400 | -2.64151100 | -1.39137500 |                                                         |
| C                     | -5.08393400 | -2.32651700 | -1.83314700 |                                                         |
| C                     | -5.38965700 | -1.01978800 | -2.18912800 |                                                         |
| C                     | -4.40076200 | -0.01997800 | -2.11284900 |                                                         |
| C                     | -3.11590300 | -0.33501600 | -1.70093000 |                                                         |
| O                     | -6.63508700 | -0.70556800 | -2.61220600 |                                                         |
| H                     | 1.99141700  | -0.70353700 | -0.80671100 |                                                         |
| H                     | 4.08288100  | -0.45635400 | -1.58716100 |                                                         |
| H                     | 6.05444200  | -0.27554700 | 0.28235100  |                                                         |
| H                     | 4.99834600  | -2.14891900 | 1.78233100  |                                                         |
| H                     | 2.31600900  | 1.01560700  | 1.68733600  |                                                         |
| H                     | 2.80996900  | 3.34340400  | -1.03273800 |                                                         |
| H                     | -1.66253800 | -0.49332500 | 1.35311900  |                                                         |
| H                     | 0.59503200  | 0.55911100  | 2.97248000  |                                                         |
| H                     | -1.60274200 | 3.63144300  | 2.16478100  |                                                         |
| H                     | -2.86685800 | 1.31699000  | 0.74128400  |                                                         |
| H                     | -2.23396200 | 1.34094100  | 3.72264900  |                                                         |
| H                     | -0.80961700 | -1.87129900 | 2.89951800  |                                                         |
| H                     | -3.52311100 | -0.65090000 | 3.44898000  |                                                         |
| H                     | -4.54513100 | 2.17606300  | 2.13201000  |                                                         |
| H                     | -0.29061800 | 3.82473600  | 0.08651500  |                                                         |
| H                     | -2.04579000 | 3.79446400  | -0.20838700 |                                                         |
| H                     | -0.22234600 | 1.68155900  | -0.62126000 |                                                         |
| H                     | 3.09455700  | -3.07956700 | -0.53512600 |                                                         |
| H                     | 2.59431100  | -3.70668300 | 1.06964700  |                                                         |
| H                     | 1.71315500  | -2.00952700 | 2.45283300  |                                                         |
| H                     | -1.98474800 | -3.33245700 | 0.70643100  |                                                         |
| H                     | -0.64347900 | -1.36983800 | -1.24500000 |                                                         |
| H                     | -3.56107800 | -3.66750100 | -1.12812500 |                                                         |
| H                     | -5.86026500 | -3.08080900 | -1.90940300 |                                                         |
| H                     | -2.35530600 | 0.43880600  | -1.62407500 |                                                         |
| H                     | -6.65997600 | 0.24857800  | -2.79801000 |                                                         |
| C                     | 5.14015800  | 2.21860000  | -1.47753800 |                                                         |
| O                     | 5.21463700  | 3.38283700  | -1.79776000 |                                                         |
| O                     | 6.15297500  | 1.34688300  | -1.70152700 |                                                         |
| H                     | 6.85874600  | 1.84955500  | -2.14467400 |                                                         |
| O                     | -4.83968900 | 1.21803400  | -2.47948500 |                                                         |
| C                     | -3.97368600 | 2.31438700  | -2.22506100 |                                                         |
| H                     | -3.04041000 | 2.22137300  | -2.78934300 |                                                         |
| H                     | -4.51632000 | 3.20416200  | -2.54278000 |                                                         |
| H                     | -3.74388500 | 2.37632700  | -1.15534600 |                                                         |
| O                     | 4.80813800  | -2.35922800 | -2.10245900 |                                                         |
| H                     | 5.72364700  | -2.15099200 | -2.36225900 |                                                         |
| O                     | 4.07882500  | -1.30198000 | -2.58399800 |                                                         |
| <b>Name</b>           |             |             |             | <b>10-FMT-O24-H-OOH-G</b>                               |
| Cartesian Coordinates |             |             |             | Energy                                                  |
| C                     | 3.06174600  | -0.03735000 | -0.86602500 | Zero-point correction= 0.576618 (Hartree/Particle)      |
| C                     | 4.25279000  | 0.89308000  | -1.20521900 | Thermal correction to Energy= 0.615889                  |
| C                     | 5.43998300  | -0.04294100 | -1.24958700 | Thermal correction to Enthalpy= 0.616834                |
| C                     | 5.06874700  | -1.32053800 | -1.23854300 | Thermal correction to Gibbs Free Energy= 0.504160       |
| C                     | 3.57636200  | -1.50302600 | -1.07529000 | Sum of electronic and zero-point Energies= -2211.424833 |

|   |             |             |             |                                              |              |
|---|-------------|-------------|-------------|----------------------------------------------|--------------|
| C | 2.56645100  | 0.12282500  | 0.56071400  | Sum of electronic and thermal Energies=      | -2211.385562 |
| O | 2.34720200  | 1.50564300  | 0.89502400  | Sum of electronic and thermal Enthalpies=    | -2211.384618 |
| C | 3.36517700  | 2.34039100  | 0.61708000  | Sum of electronic and thermal Free Energies= | -2211.497292 |
| C | 4.32867000  | 2.08357100  | -0.28282800 |                                              |              |
| O | 1.33239500  | -0.50845000 | 0.65770500  |                                              |              |
| C | -0.16844700 | -2.01632700 | 1.72996400  |                                              |              |
| C | 1.03319300  | -1.07499200 | 1.93383900  |                                              |              |
| O | 0.85880000  | -0.09550200 | 2.91253100  |                                              |              |
| C | -0.40693400 | 0.54678400  | 3.12765200  |                                              |              |
| C | -1.59592800 | -0.32929000 | 2.73037000  |                                              |              |
| C | -1.20023400 | -1.78894100 | 2.81740500  |                                              |              |
| O | 0.20271600  | -3.37903800 | 1.74917800  |                                              |              |
| O | -2.36145700 | -2.55594000 | 2.58194600  |                                              |              |
| O | -2.66843000 | 0.00015200  | 3.58822200  |                                              |              |
| C | -0.45064800 | 1.92027800  | 2.47307900  |                                              |              |
| O | -0.51679100 | 1.86117700  | 1.06046400  |                                              |              |
| C | 2.93730500  | -2.10557100 | -2.33136900 |                                              |              |
| O | 3.38472700  | -2.33699400 | 0.05644100  |                                              |              |
| O | 1.51124200  | -1.88661800 | -2.38449800 |                                              |              |
| C | 0.70979200  | -2.68023900 | -1.67939100 |                                              |              |
| C | -0.71777700 | -2.33029000 | -1.76595800 |                                              |              |
| C | -1.13450200 | -1.05394500 | -1.72955200 |                                              |              |
| O | 1.11938600  | -3.61157700 | -0.99579700 |                                              |              |
| C | -2.53868100 | -0.65495900 | -1.61160000 |                                              |              |
| C | -3.56618100 | -1.40963000 | -2.21540600 |                                              |              |
| C | -4.88203600 | -1.02914100 | -2.07291300 |                                              |              |
| C | -5.23585800 | 0.08957700  | -1.27902600 |                                              |              |
| C | -4.18131600 | 0.85116200  | -0.67693400 |                                              |              |
| C | -2.85198300 | 0.48689100  | -0.86016800 |                                              |              |
| O | -6.48790100 | 0.37418800  | -1.05950900 |                                              |              |
| H | 2.20466200  | 0.18180500  | -1.51038100 |                                              |              |
| H | 4.11029300  | 1.29523000  | -2.21992300 |                                              |              |
| H | 6.45668600  | 0.32420500  | -1.34125000 |                                              |              |
| H | 5.72554900  | -2.18376400 | -1.28596400 |                                              |              |
| H | 3.28112300  | -0.27054700 | 1.29328000  |                                              |              |
| H | 3.32848200  | 3.26570200  | 1.18397200  |                                              |              |
| H | -0.64691000 | -1.76542600 | 0.77587600  |                                              |              |
| H | 1.90119700  | -1.65825700 | 2.25998800  |                                              |              |
| H | -0.46262900 | 0.68366900  | 4.21415000  |                                              |              |
| H | -1.88192200 | -0.12794100 | 1.68540700  |                                              |              |
| H | -0.77890000 | -2.01829400 | 3.80833400  |                                              |              |
| H | 0.43811700  | -3.66306900 | 0.84841900  |                                              |              |
| H | -2.08604200 | -3.48161200 | 2.48573600  |                                              |              |
| H | -3.35336900 | -0.67707300 | 3.46007600  |                                              |              |
| H | 0.42188100  | 2.50091500  | 2.79807500  |                                              |              |
| H | -1.35579800 | 2.43429200  | 2.81619100  |                                              |              |
| H | 0.36594900  | 1.60486300  | 0.74507200  |                                              |              |
| H | 3.31227500  | -1.59420600 | -3.21959300 |                                              |              |
| H | 3.14512700  | -3.17776000 | -2.40283600 |                                              |              |
| H | 2.65746500  | -2.96096300 | -0.10886300 |                                              |              |
| H | -1.40402200 | -3.16561300 | -1.65556800 |                                              |              |
| H | -0.38844800 | -0.26034100 | -1.69117600 |                                              |              |
| H | -3.31043000 | -2.27233800 | -2.82377200 |                                              |              |
| H | -5.69262800 | -1.58009000 | -2.53852200 |                                              |              |
| H | -2.05331700 | 1.05610100  | -0.38846700 |                                              |              |

|                       |             |             |             |                                                           |
|-----------------------|-------------|-------------|-------------|-----------------------------------------------------------|
| C                     | 5.35160800  | 3.13172200  | -0.45628000 |                                                           |
| O                     | 5.48370800  | 4.12100000  | 0.22823400  |                                                           |
| O                     | 6.16273200  | 2.87603700  | -1.51017100 |                                                           |
| H                     | 6.79467800  | 3.61408700  | -1.56501100 |                                                           |
| O                     | -4.58108900 | 1.92776700  | 0.04091300  |                                                           |
| C                     | -3.66693500 | 2.46379000  | 0.99905100  |                                                           |
| H                     | -2.78421100 | 2.89421500  | 0.51647700  |                                                           |
| H                     | -4.22315200 | 3.23637300  | 1.52879900  |                                                           |
| H                     | -3.36076700 | 1.67991200  | 1.70068100  |                                                           |
| O                     | -5.57214700 | 2.74670300  | -2.41413900 |                                                           |
| H                     | -5.10547300 | 2.97852800  | -1.58431600 |                                                           |
| O                     | -6.84839600 | 2.50185300  | -1.99977400 |                                                           |
| H                     | -6.75522000 | 1.46683900  | -1.39743700 |                                                           |
| <b>Name</b>           |             |             |             | <b>6-FMT-P</b>                                            |
| Cartesian Coordinates |             |             |             | Energy                                                    |
| C                     | 3.23396500  | -1.79783900 | 0.63228400  | Zero-point correction= 0.562421 (Hartree/Particle)        |
| C                     | 1.81284900  | -2.33312700 | 0.29583200  | Thermal correction to Energy= 0.598826                    |
| C                     | 2.08366000  | -3.76379500 | -0.13015200 | Thermal correction to Enthalpy= 0.599770                  |
| C                     | 3.38426900  | -4.03953400 | -0.22351400 | Thermal correction to Gibbs Free Energy= 0.493731         |
| C                     | 4.25453400  | -2.85987600 | 0.13068000  | Sum of electronic and zero-point Energies= -2060.647747   |
| C                     | 3.46281300  | -0.41671000 | 0.04954000  | Sum of electronic and thermal Energies= -2060.611342      |
| O                     | 3.12949100  | -0.37268400 | -1.34608300 | Sum of electronic and thermal Enthalpies= -2060.610398    |
| C                     | 1.84842900  | -0.72907800 | -1.60286900 | Sum of electronic and thermal Free Energies= -2060.716437 |
| C                     | 1.14999600  | -1.56421700 | -0.82417200 |                                                           |
| O                     | 2.64080700  | 0.45427000  | 0.77736700  |                                                           |
| C                     | 2.32984800  | 2.66930600  | 1.51957800  |                                                           |
| C                     | 2.52567700  | 1.76001500  | 0.31272000  |                                                           |
| O                     | 1.38859200  | 1.80136600  | -0.53918000 |                                                           |
| C                     | 1.05754200  | 3.09639300  | -1.01918800 |                                                           |
| C                     | 0.71195700  | 4.00214000  | 0.16701300  |                                                           |
| C                     | 1.93171600  | 4.06459000  | 1.06855400  |                                                           |
| O                     | 3.54304900  | 2.69184400  | 2.23287600  |                                                           |
| O                     | 1.69434300  | 4.82206600  | 2.23442400  |                                                           |
| O                     | 0.41721500  | 5.32017600  | -0.23047800 |                                                           |
| C                     | -0.06200200 | 2.92765200  | -2.02963800 |                                                           |
| O                     | -1.19711700 | 2.27126100  | -1.45869400 |                                                           |
| C                     | 5.30056800  | -3.17874100 | 1.19854700  |                                                           |
| O                     | 5.04375600  | -2.42567500 | -0.97913800 |                                                           |
| O                     | 6.23659300  | -4.12008100 | 0.73369100  |                                                           |
| C                     | -2.18217100 | 3.05725000  | -0.94855100 |                                                           |
| C                     | -3.32973900 | 2.31902100  | -0.42085100 |                                                           |
| C                     | -3.40409300 | 0.97556600  | -0.47390100 |                                                           |
| C                     | -4.45466300 | 0.10383100  | 0.03347500  |                                                           |
| O                     | -2.09003800 | 4.27287600  | -0.93169500 |                                                           |
| C                     | -5.66378600 | 0.56614700  | 0.56441200  |                                                           |
| C                     | -6.61493200 | -0.33067900 | 1.03818000  |                                                           |
| C                     | -6.36500700 | -1.69786800 | 0.98929300  |                                                           |
| C                     | -5.15144200 | -2.17513200 | 0.45815300  |                                                           |
| C                     | -4.20682800 | -1.28341500 | -0.02003400 |                                                           |
| O                     | -7.28781100 | -2.57071100 | 1.45039100  |                                                           |
| O                     | -5.03546800 | -3.53259500 | 0.47163000  |                                                           |
| C                     | -3.81542300 | -4.08200300 | -0.00821700 |                                                           |
| C                     | -0.28920900 | -1.77260200 | -1.07591100 |                                                           |
| O                     | -0.89562900 | -2.77561700 | -0.77699900 |                                                           |

|                       |             |             |             |                                                           |
|-----------------------|-------------|-------------|-------------|-----------------------------------------------------------|
| O                     | -0.94633300 | -0.74009700 | -1.65923600 |                                                           |
| H                     | 3.32985200  | -1.69814800 | 1.71906800  |                                                           |
| H                     | 1.16043700  | -2.30551700 | 1.17557000  |                                                           |
| H                     | 1.26563100  | -4.44292200 | -0.34886800 |                                                           |
| H                     | 3.82205500  | -4.98622500 | -0.52486000 |                                                           |
| H                     | 4.50878300  | -0.09882600 | 0.07865600  |                                                           |
| H                     | 1.46084900  | -0.25344900 | -2.49889400 |                                                           |
| H                     | 1.51823400  | 2.24430100  | 2.13001700  |                                                           |
| H                     | 3.42478700  | 2.05760500  | -0.25349800 |                                                           |
| H                     | 1.91452100  | 3.53878700  | -1.55715600 |                                                           |
| H                     | -0.12314100 | 3.56042800  | 0.73115400  |                                                           |
| H                     | 2.76547000  | 4.50757500  | 0.49640900  |                                                           |
| H                     | 3.46289200  | 3.37485600  | 2.91765300  |                                                           |
| H                     | 1.33642400  | 5.68035100  | 1.95517900  |                                                           |
| H                     | -0.51504800 | 5.33655500  | -0.51518700 |                                                           |
| H                     | 0.27242600  | 2.27266300  | -2.83887000 |                                                           |
| H                     | -0.35146400 | 3.89633100  | -2.44356800 |                                                           |
| H                     | 5.79378700  | -2.23965500 | 1.49848500  |                                                           |
| H                     | 4.81366200  | -3.61338400 | 2.07597800  |                                                           |
| H                     | 4.46697500  | -2.24169900 | -1.73639400 |                                                           |
| H                     | 6.57132800  | -3.78786000 | -0.11468300 |                                                           |
| H                     | -4.09109900 | 2.94983900  | 0.02576600  |                                                           |
| H                     | -2.58233400 | 0.44522600  | -0.94320900 |                                                           |
| H                     | -5.87237400 | 1.63101200  | 0.60289500  |                                                           |
| H                     | -7.56043700 | 0.00757700  | 1.44937900  |                                                           |
| H                     | -3.26618300 | -1.64065600 | -0.43352700 |                                                           |
| H                     | -6.93843000 | -3.47092200 | 1.33475000  |                                                           |
| H                     | -3.91258100 | -5.16188400 | 0.09699500  |                                                           |
| H                     | -3.65726000 | -3.82023700 | -1.05947300 |                                                           |
| H                     | -2.96696000 | -3.71889200 | 0.57970000  |                                                           |
| H                     | -0.47357200 | 0.10221200  | -1.51805000 |                                                           |
| <b>Name</b>           |             |             |             | <b>10-FMT-P</b>                                           |
| Cartesian Coordinates |             |             |             | Energy                                                    |
| C                     | -2.78418700 | 0.56122800  | -0.53206600 | Zero-point correction= 0.563269 (Hartree/Particle)        |
| C                     | -4.11214400 | -0.00116600 | -1.09802800 | Thermal correction to Energy= 0.600232                    |
| C                     | -5.16963700 | 0.89948200  | -0.49936200 | Thermal correction to Enthalpy= 0.601176                  |
| C                     | -4.63985100 | 1.97579800  | 0.07600400  | Thermal correction to Gibbs Free Energy= 0.493852         |
| C                     | -3.12749200 | 1.96487800  | 0.07483600  | Sum of electronic and zero-point Energies= -2060.649212   |
| C                     | -2.17279600 | -0.31823500 | 0.54534700  | Sum of electronic and thermal Energies= -2060.612249      |
| O                     | -2.10527400 | -1.69633700 | 0.13456700  | Sum of electronic and thermal Enthalpies= -2060.611304    |
| C                     | -3.23988400 | -2.21539200 | -0.36421700 | Sum of electronic and thermal Free Energies= -2060.718628 |
| C                     | -4.24623800 | -1.48616300 | -0.87479900 |                                                           |
| O                     | -0.86060500 | 0.09499800  | 0.74353800  |                                                           |
| C                     | 0.94250900  | 0.74777900  | 2.15796100  |                                                           |
| C                     | -0.36998000 | -0.05072800 | 2.07652300  |                                                           |
| O                     | -0.26891200 | -1.39109600 | 2.45282400  |                                                           |
| C                     | 0.90356700  | -2.17239300 | 2.17516000  |                                                           |
| C                     | 2.18630700  | -1.33770600 | 2.13242300  |                                                           |
| C                     | 1.98707900  | -0.05363100 | 2.91041800  |                                                           |
| O                     | 0.78397900  | 1.98364700  | 2.82358700  |                                                           |
| O                     | 3.22520000  | 0.62330700  | 2.93434400  |                                                           |
| O                     | 3.22672900  | -2.13671800 | 2.65748000  |                                                           |
| C                     | 0.72121000  | -3.02325600 | 0.92638100  |                                                           |
| O                     | 0.71783200  | -2.26363300 | -0.26722700 |                                                           |

|                       |             |             |             |                                                    |
|-----------------------|-------------|-------------|-------------|----------------------------------------------------|
| C                     | -2.55403200 | 3.07133600  | -0.81718000 |                                                    |
| O                     | -2.70848400 | 2.11215500  | 1.42239000  |                                                    |
| O                     | -1.17662000 | 2.83438100  | -1.17139900 |                                                    |
| C                     | -0.22505000 | 3.14523500  | -0.29142100 |                                                    |
| C                     | 1.13655200  | 2.79756200  | -0.71296600 |                                                    |
| C                     | 1.40508200  | 1.66148300  | -1.37948700 |                                                    |
| O                     | -0.46856200 | 3.65544700  | 0.79828800  |                                                    |
| C                     | 2.75477200  | 1.16651900  | -1.65714900 |                                                    |
| C                     | 3.81266300  | 2.03861200  | -1.92902900 |                                                    |
| C                     | 5.09477500  | 1.54667100  | -2.15778500 |                                                    |
| C                     | 5.33078200  | 0.17993500  | -2.09344500 |                                                    |
| C                     | 4.27259000  | -0.70503200 | -1.80876300 |                                                    |
| C                     | 2.98914600  | -0.22164700 | -1.61005000 |                                                    |
| O                     | 6.57515900  | -0.30414600 | -2.30628900 |                                                    |
| H                     | -2.02982100 | 0.64132900  | -1.32103300 |                                                    |
| H                     | -4.12498300 | 0.15163000  | -2.18808300 |                                                    |
| H                     | -6.22863200 | 0.68720200  | -0.60139400 |                                                    |
| H                     | -5.18288600 | 2.78405900  | 0.55633300  |                                                    |
| H                     | -2.75026200 | -0.29366900 | 1.47693800  |                                                    |
| H                     | -3.26444600 | -3.30054700 | -0.33392400 |                                                    |
| H                     | 1.32047700  | 0.90497700  | 1.13990500  |                                                    |
| H                     | -1.10672900 | 0.38686200  | 2.75906200  |                                                    |
| H                     | 0.99100100  | -2.84313300 | 3.03788300  |                                                    |
| H                     | 2.42192500  | -1.05626800 | 1.09368500  |                                                    |
| H                     | 1.64566000  | -0.27043100 | 3.93453500  |                                                    |
| H                     | 0.47176800  | 2.66420600  | 2.20038800  |                                                    |
| H                     | 3.05637200  | 1.52457500  | 3.25329100  |                                                    |
| H                     | 4.00048500  | -1.55902100 | 2.76220600  |                                                    |
| H                     | -0.20386900 | -3.60612200 | 1.02034300  |                                                    |
| H                     | 1.56523700  | -3.71932300 | 0.86088000  |                                                    |
| H                     | -0.12806900 | -1.78674500 | -0.29908600 |                                                    |
| H                     | -3.07469200 | 3.07824200  | -1.77650600 |                                                    |
| H                     | -2.64602800 | 4.05069100  | -0.33715200 |                                                    |
| H                     | -1.95394500 | 2.72445100  | 1.47116800  |                                                    |
| H                     | 1.92248000  | 3.40418900  | -0.27147800 |                                                    |
| H                     | 0.57264200  | 1.01641600  | -1.66168300 |                                                    |
| H                     | 3.62789200  | 3.10708700  | -1.99330800 |                                                    |
| H                     | 5.92475200  | 2.20707200  | -2.38681600 |                                                    |
| H                     | 2.17336000  | -0.90220000 | -1.37450100 |                                                    |
| H                     | 6.54590600  | -1.27034100 | -2.19984600 |                                                    |
| C                     | -5.40215500 | -2.24309200 | -1.38781800 |                                                    |
| O                     | -5.59005000 | -3.43283200 | -1.26577900 |                                                    |
| O                     | -6.27468200 | -1.44600200 | -2.05020000 |                                                    |
| H                     | -6.99453200 | -2.01935500 | -2.36641000 |                                                    |
| O                     | 4.64822800  | -2.01483800 | -1.76368800 |                                                    |
| C                     | 3.70785300  | -2.94301800 | -1.24074500 |                                                    |
| H                     | 2.80514200  | -2.98376800 | -1.85799500 |                                                    |
| H                     | 4.20917100  | -3.91040500 | -1.24598600 |                                                    |
| H                     | 3.43447500  | -2.66866400 | -0.21537400 |                                                    |
| <b>Name</b>           |             |             |             | <b>6-FMT-C5-H-OOH-P</b>                            |
| Cartesian Coordinates |             |             |             | Energy                                             |
| C                     | 3.14031100  | -1.53118100 | 0.27097900  | Zero-point correction= 0.572861 (Hartree/Particle) |
| C                     | 1.80964400  | -2.09040500 | -0.25030200 | Thermal correction to Energy= 0.613782             |
| C                     | 2.10719700  | -3.48729200 | -0.65776200 | Thermal correction to Enthalpy= 0.614726           |

|   |             |             |             |                                              |              |
|---|-------------|-------------|-------------|----------------------------------------------|--------------|
| C | 3.41762400  | -3.76120800 | -0.56959400 | Thermal correction to Gibbs Free Energy=     | 0.496221     |
| C | 4.22606500  | -2.55448700 | -0.15038100 | Sum of electronic and zero-point Energies=   | -2211.461610 |
| C | 3.36724700  | -0.10521100 | -0.19813800 | Sum of electronic and thermal Energies=      | -2211.420689 |
| O | 3.03773000  | 0.05965500  | -1.58806500 | Sum of electronic and thermal Enthalpies=    | -2211.419745 |
| C | 1.76611000  | -0.28192600 | -1.88602900 | Sum of electronic and thermal Free Energies= | -2211.538250 |
| C | 1.09046900  | -1.24097600 | -1.22918700 |                                              |              |
| O | 2.53222300  | 0.69021100  | 0.59441100  |                                              |              |
| C | 2.17473800  | 2.82836700  | 1.51192300  |                                              |              |
| C | 2.37881100  | 2.02522200  | 0.23373700  |                                              |              |
| O | 1.23112900  | 2.09503700  | -0.60207300 |                                              |              |
| C | 0.83083700  | 3.40946000  | -0.96107500 |                                              |              |
| C | 0.47320300  | 4.19399100  | 0.30532100  |                                              |              |
| C | 1.71033200  | 4.23732600  | 1.18374900  |                                              |              |
| O | 3.40537800  | 2.84418400  | 2.19515000  |                                              |              |
| O | 1.46865700  | 4.88792300  | 2.41127900  |                                              |              |
| O | 0.10898800  | 5.52517000  | 0.02647900  |                                              |              |
| C | -0.30495600 | 3.27310600  | -1.95884300 |                                              |              |
| O | -1.39160600 | 2.51252600  | -1.42358700 |                                              |              |
| C | 5.21359700  | -2.84121800 | 0.97643900  |                                              |              |
| O | 5.05187100  | -2.08993900 | -1.22157500 |                                              |              |
| O | 6.18971400  | -3.77186500 | 0.57286200  |                                              |              |
| C | -2.39667900 | 3.20185200  | -0.81888800 |                                              |              |
| C | -3.48456000 | 2.36454100  | -0.31396500 |                                              |              |
| C | -3.49413600 | 1.02746800  | -0.47207100 |                                              |              |
| C | -4.47161300 | 0.06225200  | 0.01035800  |                                              |              |
| O | -2.36387200 | 4.41514500  | -0.70538900 |                                              |              |
| C | -5.67867700 | 0.41325600  | 0.62456400  |                                              |              |
| C | -6.55181600 | -0.56995400 | 1.07651900  |                                              |              |
| C | -6.22361100 | -1.91295700 | 0.92516800  |                                              |              |
| C | -5.01130700 | -2.27836900 | 0.30937000  |                                              |              |
| C | -4.14705700 | -1.30032300 | -0.15083800 |                                              |              |
| O | -7.06898300 | -2.86963300 | 1.36792000  |                                              |              |
| O | -4.81202200 | -3.62371200 | 0.22852500  |                                              |              |
| C | -3.57593400 | -4.06132800 | -0.32050200 |                                              |              |
| C | -0.33113200 | -1.49873000 | -1.53978400 |                                              |              |
| O | -0.87115300 | -2.57064900 | -1.40011900 |                                              |              |
| O | -1.03871700 | -0.43626900 | -1.99049300 |                                              |              |
| H | 3.10149700  | -1.49731700 | 1.36799800  |                                              |              |
| H | 1.32613800  | -4.15982100 | -0.99893000 |                                              |              |
| H | 3.89919100  | -4.70244500 | -0.81706300 |                                              |              |
| H | 4.41090700  | 0.21612500  | -0.13800300 |                                              |              |
| H | 1.36508900  | 0.28771100  | -2.71922000 |                                              |              |
| H | 1.39759700  | 2.32136200  | 2.10388500  |                                              |              |
| H | 3.26262200  | 2.39159300  | -0.31579900 |                                              |              |
| H | 1.65283400  | 3.93681800  | -1.47657700 |                                              |              |
| H | -0.32677900 | 3.66735900  | 0.84680800  |                                              |              |
| H | 2.51159400  | 4.76012300  | 0.63286600  |                                              |              |
| H | 3.30850400  | 3.44286400  | 2.95259900  |                                              |              |
| H | 1.06411900  | 5.74724600  | 2.20975300  |                                              |              |
| H | -0.83067600 | 5.52154200  | -0.23286800 |                                              |              |
| H | 0.03925200  | 2.70946200  | -2.83045600 |                                              |              |
| H | -0.65183200 | 4.25824600  | -2.27903700 |                                              |              |
| H | 5.67253900  | -1.89147400 | 1.29439700  |                                              |              |
| H | 4.68294800  | -3.27286600 | 1.82925000  |                                              |              |
| H | 4.51181400  | -1.96153400 | -2.01691400 |                                              |              |

|                       |             |             |             |                                                           |
|-----------------------|-------------|-------------|-------------|-----------------------------------------------------------|
| H                     | 6.59159600  | -3.42731000 | -0.24041100 |                                                           |
| H                     | -4.25563800 | 2.91606800  | 0.21356400  |                                                           |
| H                     | -2.67009100 | 0.58087500  | -1.01769600 |                                                           |
| H                     | -5.94628200 | 1.45847400  | 0.74640200  |                                                           |
| H                     | -7.49430400 | -0.31861400 | 1.55189900  |                                                           |
| H                     | -3.21115000 | -1.57149300 | -0.63396800 |                                                           |
| H                     | -6.66929100 | -3.73668300 | 1.18273000  |                                                           |
| H                     | -3.59986000 | -5.14968400 | -0.27817100 |                                                           |
| H                     | -3.46970600 | -3.72860300 | -1.35785900 |                                                           |
| H                     | -2.73381400 | -3.67860900 | 0.26526700  |                                                           |
| H                     | -0.62033000 | 0.40743300  | -1.73153700 |                                                           |
| O                     | 1.72566000  | -3.19391000 | 2.48232500  |                                                           |
| H                     | 1.53293200  | -4.12654400 | 2.27912800  |                                                           |
| O                     | 0.65451200  | -2.51224800 | 1.93882500  |                                                           |
| H                     | 1.06428700  | -2.22096800 | 0.81157100  |                                                           |
| <b>Name</b>           |             |             |             | <b>6-FMT-O24-H-OOH-P</b>                                  |
| Cartesian Coordinates |             |             |             | Energy                                                    |
| C                     | 3.16544700  | -2.24018100 | 0.59218700  | Zero-point correction= 0.573682 (Hartree/Particle)        |
| C                     | 1.70564400  | -2.49399100 | 0.11900700  | Thermal correction to Energy= 0.611460                    |
| C                     | 1.75794700  | -3.92441400 | -0.38384700 | Thermal correction to Enthalpy= 0.612404                  |
| C                     | 2.99364800  | -4.42348800 | -0.40017500 | Thermal correction to Gibbs Free Energy= 0.502610         |
| C                     | 4.02335300  | -3.44048300 | 0.09765800  | Sum of electronic and zero-point Energies= -2211.470734   |
| C                     | 3.67878900  | -0.89414500 | 0.11901400  | Sum of electronic and thermal Energies= -2211.432957      |
| O                     | 3.47503800  | -0.71863600 | -1.29156400 | Sum of electronic and thermal Enthalpies= -2211.432012    |
| C                     | 2.17744500  | -0.82375100 | -1.66121300 | Sum of electronic and thermal Free Energies= -2211.541806 |
| C                     | 1.28153700  | -1.55790200 | -0.98963200 |                                                           |
| O                     | 2.96097800  | 0.07040700  | 0.83945400  |                                                           |
| C                     | 2.99510600  | 2.25881100  | 1.71011100  |                                                           |
| C                     | 3.11341000  | 1.39853700  | 0.45813400  |                                                           |
| O                     | 2.06546800  | 1.69326800  | -0.45836000 |                                                           |
| C                     | 2.00336400  | 3.05276700  | -0.86407700 |                                                           |
| C                     | 1.73772700  | 3.93613800  | 0.35932900  |                                                           |
| C                     | 2.88206400  | 3.72683500  | 1.33469300  |                                                           |
| O                     | 4.13976500  | 2.02011600  | 2.49287700  |                                                           |
| O                     | 2.69757700  | 4.44411800  | 2.53449300  |                                                           |
| O                     | 1.70810600  | 5.30597000  | 0.03545600  |                                                           |
| C                     | 0.94939700  | 3.14972900  | -1.95139200 |                                                           |
| O                     | -0.32153500 | 2.66646000  | -1.50188600 |                                                           |
| C                     | 4.90077800  | -3.99969900 | 1.21742500  |                                                           |
| O                     | 4.96896500  | -3.09614500 | -0.91713400 |                                                           |
| O                     | 5.69057700  | -5.07054700 | 0.76261700  |                                                           |
| C                     | -1.19024600 | 3.57299900  | -0.99163500 |                                                           |
| C                     | -2.48553800 | 3.00651500  | -0.59496900 |                                                           |
| C                     | -2.78393400 | 1.70627400  | -0.77209200 |                                                           |
| C                     | -4.00528300 | 1.01021700  | -0.39013200 |                                                           |
| O                     | -0.90372300 | 4.74978700  | -0.86762400 |                                                           |
| C                     | -5.14349500 | 1.66528400  | 0.12757200  |                                                           |
| C                     | -6.25717700 | 0.93985000  | 0.48350500  |                                                           |
| C                     | -6.29891700 | -0.46797600 | 0.32044600  |                                                           |
| C                     | -5.12909400 | -1.12661500 | -0.18327600 |                                                           |
| C                     | -4.00928500 | -0.38634400 | -0.54086000 |                                                           |
| O                     | -7.39447900 | -1.12852600 | 0.56608500  |                                                           |
| O                     | -5.21100300 | -2.47421100 | -0.26080000 |                                                           |
| C                     | -4.15646100 | -3.16495000 | -0.93085100 |                                                           |

|                       |             |             |             |                                                           |
|-----------------------|-------------|-------------|-------------|-----------------------------------------------------------|
| C                     | -0.14661000 | -1.47839400 | -1.34824000 |                                                           |
| O                     | -0.95055300 | -2.36280600 | -1.16034800 |                                                           |
| O                     | -0.55594600 | -0.30727200 | -1.89684000 |                                                           |
| H                     | 3.18639400  | -2.21488000 | 1.68721900  |                                                           |
| H                     | 0.99779100  | -2.39882100 | 0.94976900  |                                                           |
| H                     | 0.85553600  | -4.43389300 | -0.70700300 |                                                           |
| H                     | 3.28315200  | -5.41598400 | -0.73154400 |                                                           |
| H                     | 4.75769700  | -0.76903200 | 0.24527100  |                                                           |
| H                     | 1.95359700  | -0.23972500 | -2.54911200 |                                                           |
| H                     | 2.08011300  | 1.95294300  | 2.24052500  |                                                           |
| H                     | 4.08901400  | 1.55969700  | -0.03108700 |                                                           |
| H                     | 2.96116700  | 3.36480600  | -1.31644000 |                                                           |
| H                     | 0.80054500  | 3.62035500  | 0.84157600  |                                                           |
| H                     | 3.81928700  | 4.04523700  | 0.84602700  |                                                           |
| H                     | 4.13054700  | 2.65951000  | 3.22290700  |                                                           |
| H                     | 2.52833100  | 5.37050900  | 2.29849600  |                                                           |
| H                     | 0.81420600  | 5.51112500  | -0.29293600 |                                                           |
| H                     | 1.22293300  | 2.49954400  | -2.78666100 |                                                           |
| H                     | 0.85951400  | 4.17897100  | -2.30637200 |                                                           |
| H                     | 5.52513200  | -3.18296900 | 1.61525200  |                                                           |
| H                     | 4.27096300  | -4.38289700 | 2.02511900  |                                                           |
| H                     | 4.50058200  | -2.78715400 | -1.70768400 |                                                           |
| H                     | 6.15541700  | -4.76046400 | -0.03100000 |                                                           |
| H                     | -3.15656900 | 3.72534800  | -0.13657700 |                                                           |
| H                     | -2.03868000 | 1.07240000  | -1.24069000 |                                                           |
| H                     | -5.14460400 | 2.74493000  | 0.24078400  |                                                           |
| H                     | -7.15044500 | 1.41502500  | 0.87555300  |                                                           |
| H                     | -3.12119600 | -0.87717600 | -0.93255500 |                                                           |
| H                     | -4.46420500 | -4.20928400 | -0.95644900 |                                                           |
| H                     | -4.03896300 | -2.78304200 | -1.94965700 |                                                           |
| H                     | -3.20767800 | -3.05897300 | -0.39693100 |                                                           |
| H                     | 0.05451100  | 0.41802800  | -1.66425000 |                                                           |
| O                     | -5.57296200 | -2.22435500 | 2.49946900  |                                                           |
| H                     | -5.13786500 | -2.69753500 | 1.76069500  |                                                           |
| O                     | -6.88531900 | -2.56562700 | 2.36075000  |                                                           |
| H                     | -7.23155200 | -1.95232700 | 1.37447900  |                                                           |
| <b>Name</b>           |             |             |             | <b>10-FMT-C5-H-OOH-P</b>                                  |
| Cartesian Coordinates |             |             |             | Energy                                                    |
| C                     | 2.61888400  | -0.37426900 | 0.02942400  | Zero-point correction= 0.573945 (Hartree/Particle)        |
| C                     | 3.96990800  | 0.13506300  | -0.48220600 | Thermal correction to Energy= 0.612712                    |
| C                     | 5.00122600  | -0.52731500 | 0.34363700  | Thermal correction to Enthalpy= 0.613656                  |
| C                     | 4.46469600  | -1.49550600 | 1.09913200  | Thermal correction to Gibbs Free Energy= 0.502351         |
| C                     | 2.95589800  | -1.55993100 | 0.98918400  | Sum of electronic and zero-point Energies= -2211.470638   |
| C                     | 1.84281700  | 0.71343500  | 0.74559600  | Sum of electronic and thermal Energies= -2211.431871      |
| O                     | 1.75148100  | 1.90068300  | -0.07660300 | Sum of electronic and thermal Enthalpies= -2211.430927    |
| C                     | 2.87519700  | 2.32209500  | -0.66987100 | Sum of electronic and thermal Free Energies= -2211.542231 |
| C                     | 3.98951500  | 1.57198800  | -0.82153400 |                                                           |
| O                     | 0.54064500  | 0.27697400  | 0.94124600  |                                                           |
| C                     | -1.37261900 | -0.06671500 | 2.32202000  |                                                           |
| C                     | -0.08526700 | 0.75192000  | 2.13554700  |                                                           |
| O                     | -0.26378000 | 2.13530900  | 2.11351400  |                                                           |
| C                     | -1.43656600 | 2.74189800  | 1.54655300  |                                                           |
| C                     | -2.69088700 | 1.87152600  | 1.67705200  |                                                           |
| C                     | -2.49608500 | 0.84594600  | 2.77461900  |                                                           |



|   |             |             |             |
|---|-------------|-------------|-------------|
| O | -1.22984100 | -1.08380200 | 3.29098900  |
| O | -3.70658200 | 0.13335700  | 2.90673300  |
| O | -3.77824200 | 2.73722000  | 1.93161600  |
| C | -1.18801500 | 3.19368200  | 0.11464400  |
| O | -1.07394900 | 2.11573700  | -0.79457900 |
| C | 2.50037500  | -2.87986800 | 0.35837800  |
| O | 2.43608200  | -1.37605300 | 2.29585200  |
| O | 1.14410000  | -2.81519400 | -0.12697700 |
| C | 0.14363400  | -2.95225000 | 0.73933000  |
| C | -1.19622600 | -2.82723600 | 0.15530300  |
| C | -1.46495500 | -1.95590800 | -0.83216100 |
| O | 0.32154200  | -3.13953900 | 1.94073200  |
| C | -2.81171800 | -1.65727200 | -1.32338500 |
| C | -3.80175400 | -2.64151100 | -1.39137500 |
| C | -5.08393400 | -2.32651700 | -1.83314700 |
| C | -5.38965700 | -1.01978800 | -2.18912800 |
| C | -4.40076200 | -0.01997800 | -2.11284900 |
| C | -3.11590300 | -0.33501600 | -1.70093000 |
| O | -6.63508700 | -0.70556800 | -2.61220600 |
| H | 1.99141700  | -0.70353700 | -0.80671100 |
| H | 4.08288100  | -0.45635400 | -1.58716100 |
| H | 6.05444200  | -0.27554700 | 0.28235100  |
| H | 4.99834600  | -2.14891900 | 1.78233100  |
| H | 2.31600900  | 1.01560700  | 1.68733600  |
| H | 2.80996900  | 3.34340400  | -1.03273800 |
| H | -1.66253800 | -0.49332500 | 1.35311900  |
| H | 0.59503200  | 0.55911100  | 2.97248000  |
| H | -1.60274200 | 3.63144300  | 2.16478100  |
| H | -2.86685800 | 1.31699000  | 0.74128400  |
| H | -2.23396200 | 1.34094100  | 3.72264900  |
| H | -0.80961700 | -1.87129900 | 2.89951800  |
| H | -3.52311100 | -0.65090000 | 3.44898000  |
| H | -4.54513100 | 2.17606300  | 2.13201000  |
| H | -0.29061800 | 3.82473600  | 0.08651500  |
| H | -2.04579000 | 3.79446400  | -0.20838700 |
| H | -0.22234600 | 1.68155900  | -0.62126000 |
| H | 3.09455700  | -3.07956700 | -0.53512600 |
| H | 2.59431100  | -3.70668300 | 1.06964700  |
| H | 1.71315500  | -2.00952700 | 2.45283300  |
| H | -1.98474800 | -3.33245700 | 0.70643100  |
| H | -0.64347900 | -1.36983800 | -1.24500000 |
| H | -3.56107800 | -3.66750100 | -1.12812500 |
| H | -5.86026500 | -3.08080900 | -1.90940300 |
| H | -2.35530600 | 0.43880600  | -1.62407500 |
| H | -6.65997600 | 0.24857800  | -2.79801000 |
| C | 5.14015800  | 2.21860000  | -1.47753800 |
| O | 5.21463700  | 3.38283700  | -1.79776000 |
| O | 6.15297500  | 1.34688300  | -1.70152700 |
| H | 6.85874600  | 1.84955500  | -2.14467400 |
| O | -4.83968900 | 1.21803400  | -2.47948500 |
| C | -3.97368600 | 2.31438700  | -2.22506100 |
| H | -3.04041000 | 2.22137300  | -2.78934300 |
| H | -4.51632000 | 3.20416200  | -2.54278000 |
| H | -3.74388500 | 2.37632700  | -1.15534600 |
| O | 4.80813800  | -2.35922800 | -2.10245900 |

|                       |             |             |             |                                                           |
|-----------------------|-------------|-------------|-------------|-----------------------------------------------------------|
| H                     | 5.72364700  | -2.15099200 | -2.36225900 |                                                           |
| O                     | 4.07882500  | -1.30198000 | -2.58399800 |                                                           |
| <b>Name</b>           |             |             |             | <b>10-FMT-O24-H-OOH-P</b>                                 |
| Cartesian Coordinates |             |             |             | Energy                                                    |
| C                     | 3.06174600  | -0.03735000 | -0.86602500 | Zero-point correction= 0.575012 (Hartree/Particle)        |
| C                     | 4.25279000  | 0.89308000  | -1.20521900 | Thermal correction to Energy= 0.613130                    |
| C                     | 5.43998300  | -0.04294100 | -1.24958700 | Thermal correction to Enthalpy= 0.614074                  |
| C                     | 5.06874700  | -1.32053800 | -1.23854300 | Thermal correction to Gibbs Free Energy= 0.503743         |
| C                     | 3.57636200  | -1.50302600 | -1.07529000 | Sum of electronic and zero-point Energies= -2211.471946   |
| C                     | 2.56645100  | 0.12282500  | 0.56071400  | Sum of electronic and thermal Energies= -2211.433829      |
| O                     | 2.34720200  | 1.50564300  | 0.89502400  | Sum of electronic and thermal Enthalpies= -2211.432885    |
| C                     | 3.36517700  | 2.34039100  | 0.61708000  | Sum of electronic and thermal Free Energies= -2211.543215 |
| C                     | 4.32867000  | 2.08357100  | -0.28282800 |                                                           |
| O                     | 1.33239500  | -0.50845000 | 0.65770500  |                                                           |
| C                     | -0.16844700 | -2.01632700 | 1.72996400  |                                                           |
| C                     | 1.03319300  | -1.07499200 | 1.93383900  |                                                           |
| O                     | 0.85880000  | -0.09550200 | 2.91253100  |                                                           |
| C                     | -0.40693400 | 0.54678400  | 3.12765200  |                                                           |
| C                     | -1.59592800 | -0.32929000 | 2.73037000  |                                                           |
| C                     | -1.20023400 | -1.78894100 | 2.81740500  |                                                           |
| O                     | 0.20271600  | -3.37903800 | 1.74917800  |                                                           |
| O                     | -2.36145700 | -2.55594000 | 2.58194600  |                                                           |
| O                     | -2.66843000 | 0.00015200  | 3.58822200  |                                                           |
| C                     | -0.45064800 | 1.92027800  | 2.47307900  |                                                           |
| O                     | -0.51679100 | 1.86117700  | 1.06046400  |                                                           |
| C                     | 2.93730500  | -2.10557100 | -2.33136900 |                                                           |
| O                     | 3.38472700  | -2.33699400 | 0.05644100  |                                                           |
| O                     | 1.51124200  | -1.88661800 | -2.38449800 |                                                           |
| C                     | 0.70979200  | -2.68023900 | -1.67939100 |                                                           |
| C                     | -0.71777700 | -2.33029000 | -1.76595800 |                                                           |
| C                     | -1.13450200 | -1.05394500 | -1.72955200 |                                                           |
| O                     | 1.11938600  | -3.61157700 | -0.99579700 |                                                           |
| C                     | -2.53868100 | -0.65495900 | -1.61160000 |                                                           |
| C                     | -3.56618100 | -1.40963000 | -2.21540600 |                                                           |
| C                     | -4.88203600 | -1.02914100 | -2.07291300 |                                                           |
| C                     | -5.23585800 | 0.08957700  | -1.27902600 |                                                           |
| C                     | -4.18131600 | 0.85116200  | -0.67693400 |                                                           |
| C                     | -2.85198300 | 0.48689100  | -0.86016800 |                                                           |
| O                     | -6.48790100 | 0.37418800  | -1.05950900 |                                                           |
| H                     | 2.20466200  | 0.18180500  | -1.51038100 |                                                           |
| H                     | 4.11029300  | 1.29523000  | -2.21992300 |                                                           |
| H                     | 6.45668600  | 0.32420500  | -1.34125000 |                                                           |
| H                     | 5.72554900  | -2.18376400 | -1.28596400 |                                                           |
| H                     | 3.28112300  | -0.27054700 | 1.29328000  |                                                           |
| H                     | 3.32848200  | 3.26570200  | 1.18397200  |                                                           |
| H                     | -0.64691000 | -1.76542600 | 0.77587600  |                                                           |
| H                     | 1.90119700  | -1.65825700 | 2.25998800  |                                                           |
| H                     | -0.46262900 | 0.68366900  | 4.21415000  |                                                           |
| H                     | -1.88192200 | -0.12794100 | 1.68540700  |                                                           |
| H                     | -0.77890000 | -2.01829400 | 3.80833400  |                                                           |
| H                     | 0.43811700  | -3.66306900 | 0.84841900  |                                                           |
| H                     | -2.08604200 | -3.48161200 | 2.48573600  |                                                           |
| H                     | -3.35336900 | -0.67707300 | 3.46007600  |                                                           |
| H                     | 0.42188100  | 2.50091500  | 2.79807500  |                                                           |

|                              |             |             |             |                                                           |
|------------------------------|-------------|-------------|-------------|-----------------------------------------------------------|
| H                            | -1.35579800 | 2.43429200  | 2.81619100  |                                                           |
| H                            | 0.36594900  | 1.60486300  | 0.74507200  |                                                           |
| H                            | 3.31227500  | -1.59420600 | -3.21959300 |                                                           |
| H                            | 3.14512700  | -3.17776000 | -2.40283600 |                                                           |
| H                            | 2.65746500  | -2.96096300 | -0.10886300 |                                                           |
| H                            | -1.40402200 | -3.16561300 | -1.65556800 |                                                           |
| H                            | -0.38844800 | -0.26034100 | -1.69117600 |                                                           |
| H                            | -3.31043000 | -2.27233800 | -2.82377200 |                                                           |
| H                            | -5.69262800 | -1.58009000 | -2.53852200 |                                                           |
| H                            | -2.05331700 | 1.05610100  | -0.38846700 |                                                           |
| C                            | 5.35160800  | 3.13172200  | -0.45628000 |                                                           |
| O                            | 5.48370800  | 4.12100000  | 0.22823400  |                                                           |
| O                            | 6.16273200  | 2.87603700  | -1.51017100 |                                                           |
| H                            | 6.79467800  | 3.61408700  | -1.56501100 |                                                           |
| O                            | -4.58108900 | 1.92776700  | 0.04091300  |                                                           |
| C                            | -3.66693500 | 2.46379000  | 0.99905100  |                                                           |
| H                            | -2.78421100 | 2.89421500  | 0.51647700  |                                                           |
| H                            | -4.22315200 | 3.23637300  | 1.52879900  |                                                           |
| H                            | -3.36076700 | 1.67991200  | 1.70068100  |                                                           |
| O                            | -5.57214700 | 2.74670300  | -2.41413900 |                                                           |
| H                            | -5.10547300 | 2.97852800  | -1.58431600 |                                                           |
| O                            | -6.84839600 | 2.50185300  | -1.99977400 |                                                           |
| H                            | -6.75522000 | 1.46683900  | -1.39743700 |                                                           |
| <b>Name</b>                  |             |             |             | <b>6-FMT-ANION</b>                                        |
| <b>Cartesian Coordinates</b> |             |             |             | <b>Energy</b>                                             |
| C                            | 1.97722000  | -2.40378000 | 0.67975600  | Zero-point correction= 0.549925 (Hartree/Particle)        |
| C                            | 0.43975400  | -2.50330400 | 0.78709600  | Thermal correction to Energy= 0.587225                    |
| C                            | 0.23619800  | -4.00185100 | 0.92701600  | Thermal correction to Enthalpy= 0.588169                  |
| C                            | 1.33212400  | -4.69987000 | 0.62292100  | Thermal correction to Gibbs Free Energy= 0.479781         |
| C                            | 2.47263900  | -3.79921300 | 0.21462200  | Sum of electronic and zero-point Energies= -2060.224295   |
| C                            | 2.48306200  | -1.25694100 | -0.17451900 | Sum of electronic and thermal Energies= -2060.186995      |
| O                            | 1.79628300  | -1.11219700 | -1.41104000 | Sum of electronic and thermal Enthalpies= -2060.186051    |
| C                            | 0.45448400  | -1.35880900 | -1.42132300 | Sum of electronic and thermal Free Energies= -2060.294440 |
| C                            | -0.23914300 | -1.97255000 | -0.45446700 |                                                           |
| O                            | 2.36503200  | -0.05538600 | 0.56240900  |                                                           |
| C                            | 3.40344500  | 1.88558200  | 1.48907100  |                                                           |
| C                            | 3.45999100  | 0.82098700  | 0.38694700  |                                                           |
| O                            | 3.52653900  | 1.32748600  | -0.92175100 |                                                           |
| C                            | 2.79788500  | 2.49944900  | -1.31928500 |                                                           |
| C                            | 2.54779800  | 3.46499800  | -0.15152800 |                                                           |
| C                            | 3.62290500  | 3.26936200  | 0.90357400  |                                                           |
| O                            | 4.38822800  | 1.54039900  | 2.44953800  |                                                           |
| O                            | 3.48159500  | 4.20203700  | 1.96034500  |                                                           |
| O                            | 2.57646600  | 4.80834300  | -0.59967100 |                                                           |
| C                            | 1.56110000  | 2.15631900  | -2.14943300 |                                                           |
| O                            | 0.36412300  | 1.93942200  | -1.37602100 |                                                           |
| C                            | 3.81267200  | -4.14650300 | 0.85267000  |                                                           |
| O                            | 2.71534200  | -3.88582900 | -1.19677200 |                                                           |
| O                            | 4.28778100  | -5.41390400 | 0.42326100  |                                                           |
| C                            | -0.39695200 | 3.01790500  | -1.13563900 |                                                           |
| C                            | -1.68109300 | 2.75148300  | -0.48207600 |                                                           |
| C                            | -2.26898700 | 1.54357600  | -0.42640700 |                                                           |
| C                            | -3.58743000 | 1.29485500  | 0.16561100  |                                                           |
| O                            | -0.04650700 | 4.15417500  | -1.43865200 |                                                           |

|                       |             |             |             |                                                           |
|-----------------------|-------------|-------------|-------------|-----------------------------------------------------------|
| C                     | -4.16295200 | 2.16035600  | 1.10418200  |                                                           |
| C                     | -5.43470300 | 1.90636700  | 1.61036400  |                                                           |
| C                     | -6.14449000 | 0.79355200  | 1.17713700  |                                                           |
| C                     | -5.57480500 | -0.08783900 | 0.24154600  |                                                           |
| C                     | -4.30157500 | 0.15643200  | -0.25220300 |                                                           |
| O                     | -7.39485300 | 0.55670700  | 1.67324000  |                                                           |
| O                     | -6.37089100 | -1.14331600 | -0.10212900 |                                                           |
| C                     | -5.84795800 | -2.06801400 | -1.05368900 |                                                           |
| C                     | -1.72594400 | -2.15311000 | -0.61830500 |                                                           |
| O                     | -2.37264500 | -2.46959600 | 0.42127500  |                                                           |
| O                     | -2.23911300 | -1.98461800 | -1.76334500 |                                                           |
| H                     | 2.38522800  | -2.24115600 | 1.68306000  |                                                           |
| H                     | 0.06546800  | -1.97167800 | 1.66967300  |                                                           |
| H                     | -0.71961200 | -4.42788600 | 1.21530600  |                                                           |
| H                     | 1.41962000  | -5.78274500 | 0.60839900  |                                                           |
| H                     | 3.52772800  | -1.41085800 | -0.45965500 |                                                           |
| H                     | -0.00193400 | -1.00662800 | -2.34111700 |                                                           |
| H                     | 2.40901100  | 1.86891400  | 1.95396100  |                                                           |
| H                     | 4.38893200  | 0.25200200  | 0.50050300  |                                                           |
| H                     | 3.48593600  | 3.00772700  | -2.00325100 |                                                           |
| H                     | 1.58600900  | 3.26365300  | 0.33805800  |                                                           |
| H                     | 4.62493800  | 3.34650600  | 0.45736900  |                                                           |
| H                     | 4.26367600  | 2.11117200  | 3.22579700  |                                                           |
| H                     | 3.52447400  | 5.09447700  | 1.57709400  |                                                           |
| H                     | 1.71977400  | 4.97784500  | -1.03393100 |                                                           |
| H                     | 1.73293200  | 1.22092400  | -2.68337400 |                                                           |
| H                     | 1.37216100  | 2.95535500  | -2.86828900 |                                                           |
| H                     | 4.54221400  | -3.36036900 | 0.61009100  |                                                           |
| H                     | 3.70059100  | -4.19898900 | 1.93793200  |                                                           |
| H                     | 1.86423500  | -3.85451700 | -1.66638800 |                                                           |
| H                     | 4.31835800  | -5.39695900 | -0.54824000 |                                                           |
| H                     | -2.17060300 | 3.64694800  | -0.11109700 |                                                           |
| H                     | -1.77329400 | 0.68636500  | -0.88469100 |                                                           |
| H                     | -3.61539500 | 3.02717200  | 1.46133400  |                                                           |
| H                     | -5.88838900 | 2.56397400  | 2.34583700  |                                                           |
| H                     | -3.84369100 | -0.52255900 | -0.96630400 |                                                           |
| H                     | -7.74922400 | -0.25402200 | 1.26476000  |                                                           |
| H                     | -6.62781600 | -2.81417600 | -1.20240600 |                                                           |
| H                     | -5.63003800 | -1.56265900 | -2.00035700 |                                                           |
| H                     | -4.94180700 | -2.54426400 | -0.66738600 |                                                           |
| <b>Name</b>           |             |             |             | <b>6-FMT-DIANION</b>                                      |
| Cartesian Coordinates |             |             |             | Energy                                                    |
| C                     | 0.05754400  | -2.45873000 | 0.50043200  | Zero-point correction= 0.536409 (Hartree/Particle)        |
| C                     | -0.80230900 | -1.63758100 | -0.49313900 | Thermal correction to Energy= 0.573325                    |
| C                     | -1.96235100 | -2.57618400 | -0.76576500 | Thermal correction to Enthalpy= 0.574270                  |
| C                     | -1.76369200 | -3.80244800 | -0.27929100 | Thermal correction to Gibbs Free Energy= 0.465875         |
| C                     | -0.42217600 | -3.93430000 | 0.39855600  | Sum of electronic and zero-point Energies= -2059.778150   |
| C                     | 1.54548800  | -2.28305000 | 0.28300100  | Sum of electronic and thermal Energies= -2059.741234      |
| O                     | 1.92436800  | -2.44684800 | -1.07834700 | Sum of electronic and thermal Enthalpies= -2059.740290    |
| C                     | 1.18594400  | -1.72937500 | -1.97959800 | Sum of electronic and thermal Free Energies= -2059.848685 |
| C                     | -0.05995500 | -1.29007800 | -1.76503400 |                                                           |
| O                     | 1.88950400  | -0.98619200 | 0.72830600  |                                                           |
| C                     | 3.65811400  | 0.19273100  | 1.82438800  |                                                           |
| C                     | 3.26883500  | -0.68465400 | 0.62477400  |                                                           |

|   |             |             |             |
|---|-------------|-------------|-------------|
| O | 3.58665900  | -0.14757600 | -0.63574200 |
| C | 3.57646700  | 1.25997900  | -0.91514800 |
| C | 3.65015600  | 2.12328900  | 0.34703000  |
| C | 4.47754100  | 1.39468900  | 1.39147000  |
| O | 4.35628600  | -0.64338500 | 2.73377200  |
| O | 4.68698700  | 2.19716900  | 2.54036100  |
| O | 4.25445400  | 3.37077000  | 0.05645500  |
| C | 2.44715400  | 1.63151600  | -1.86966600 |
| O | 1.18304700  | 1.83944200  | -1.22075300 |
| C | -0.47608200 | -4.58153300 | 1.77754700  |
| O | 0.44975600  | -4.78613900 | -0.35736000 |
| O | -0.92287700 | -5.92806000 | 1.71416400  |
| C | 0.88389500  | 3.10101400  | -0.84390400 |
| C | -0.44726100 | 3.28591600  | -0.29807800 |
| C | -1.37662500 | 2.29828200  | -0.25634300 |
| C | -2.72106000 | 2.38003000  | 0.26095000  |
| O | 1.69787500  | 4.02098100  | -0.95478700 |
| C | -3.26216400 | 3.54164400  | 0.84094400  |
| C | -4.55655000 | 3.55565600  | 1.33054900  |
| C | -5.40714200 | 2.41353200  | 1.28071100  |
| C | -4.83502400 | 1.23726200  | 0.67443000  |
| C | -3.54520500 | 1.22687000  | 0.18894200  |
| O | -6.60947300 | 2.41312100  | 1.74442500  |
| O | -5.68359100 | 0.15401100  | 0.63201500  |
| C | -5.16089600 | -1.04132900 | 0.07322400  |
| C | -0.74150800 | -0.46485900 | -2.82707600 |
| O | -1.94359500 | -0.14078100 | -2.60993300 |
| O | -0.08386100 | -0.14276200 | -3.86009500 |
| H | -0.15682400 | -2.11376200 | 1.51776100  |
| H | -1.15914700 | -0.71594400 | -0.01902800 |
| H | -2.83575900 | -2.25636800 | -1.32580100 |
| H | -2.43879300 | -4.64771100 | -0.38156600 |
| H | 2.13900700  | -3.02806900 | 0.82171800  |
| H | 1.72852300  | -1.56215000 | -2.90408000 |
| H | 2.74166800  | 0.56856200  | 2.29708000  |
| H | 3.83945300  | -1.61799600 | 0.67827000  |
| H | 4.50817700  | 1.43264300  | -1.46686000 |
| H | 2.65255100  | 2.28949600  | 0.77722500  |
| H | 5.44115900  | 1.07636300  | 0.96715700  |
| H | 4.45568900  | -0.16196700 | 3.57172200  |
| H | 5.12870300  | 3.01474400  | 2.25489200  |
| H | 3.56943600  | 3.91953400  | -0.37143900 |
| H | 2.28282100  | 0.81143800  | -2.57221100 |
| H | 2.71874000  | 2.53188100  | -2.42438500 |
| H | 0.52123500  | -4.52774400 | 2.23736000  |
| H | -1.18462600 | -4.04166400 | 2.40982100  |
| H | 0.44869400  | -4.49604900 | -1.28548000 |
| H | -0.32935500 | -6.40401000 | 1.10941000  |
| H | -0.64213800 | 4.29105200  | 0.06235100  |
| H | -1.09328400 | 1.32914100  | -0.66472500 |
| H | -2.66061800 | 4.44445000  | 0.91249800  |
| H | -4.96409500 | 4.45811100  | 1.78015800  |
| H | -3.13481000 | 0.33049100  | -0.26733200 |
| H | -5.96240200 | -1.77875300 | 0.12797900  |
| H | -4.86936800 | -0.89135700 | -0.97325300 |

|                       |             |             |             |                                                           |
|-----------------------|-------------|-------------|-------------|-----------------------------------------------------------|
| H                     | -4.29581000 | -1.39408700 | 0.64748000  |                                                           |
| <b>Name</b>           |             |             |             | <b>10-FMT-ANION</b>                                       |
| Cartesian Coordinates |             |             |             | Energy                                                    |
| C                     | -2.64612900 | 0.61269300  | 0.56378700  | Zero-point correction= 0.549381 (Hartree/Particle)        |
| C                     | -3.83301300 | 1.50135000  | 0.11158000  | Thermal correction to Energy= 0.586344                    |
| C                     | -4.97134400 | 1.06336900  | 1.00306400  | Thermal correction to Enthalpy= 0.587288                  |
| C                     | -4.55668500 | 0.28818700  | 2.00294900  | Thermal correction to Gibbs Free Energy= 0.478773         |
| C                     | -3.08195300 | -0.03077500 | 1.92459900  | Sum of electronic and zero-point Energies= -2060.232817   |
| C                     | -2.30936400 | -0.46355300 | -0.45344700 | Sum of electronic and thermal Energies= -2060.195853      |
| O                     | -2.17700700 | 0.07097300  | -1.77207400 | Sum of electronic and thermal Enthalpies= -2060.194909    |
| C                     | -3.22984500 | 0.82746600  | -2.19180900 | Sum of electronic and thermal Free Energies= -2060.303424 |
| C                     | -4.07860000 | 1.46404700  | -1.37444600 |                                                           |
| O                     | -1.05989000 | -0.99167800 | -0.10580300 |                                                           |
| C                     | 0.43782800  | -2.79552200 | 0.26184000  |                                                           |
| C                     | -0.78199100 | -2.31700600 | -0.53530500 |                                                           |
| O                     | -0.60036700 | -2.40566800 | -1.92617500 |                                                           |
| C                     | 0.69354100  | -2.11910600 | -2.48743600 |                                                           |
| C                     | 1.83131100  | -2.85844100 | -1.75753500 |                                                           |
| C                     | 1.28945100  | -3.69920900 | -0.61429100 |                                                           |
| O                     | 0.04688900  | -3.51283400 | 1.41765600  |                                                           |
| O                     | 2.39863200  | -4.20820500 | 0.10758100  |                                                           |
| O                     | 2.51571200  | -3.65139600 | -2.71963200 |                                                           |
| C                     | 0.95065600  | -0.62598900 | -2.64438500 |                                                           |
| O                     | 1.19108900  | 0.06393200  | -1.42554700 |                                                           |
| C                     | -2.31791200 | 0.60358600  | 3.09429500  |                                                           |
| O                     | -2.97992000 | -1.45598600 | 1.95554500  |                                                           |
| O                     | -0.90210800 | 0.73642700  | 2.83135100  |                                                           |
| C                     | -0.11759300 | -0.33582000 | 2.89671200  |                                                           |
| C                     | 1.26087700  | -0.12886900 | 2.45602500  |                                                           |
| C                     | 1.64320400  | 0.95599500  | 1.75686700  |                                                           |
| O                     | -0.53038500 | -1.43528000 | 3.27543100  |                                                           |
| C                     | 2.95639700  | 1.16286400  | 1.14935900  |                                                           |
| C                     | 3.89941700  | 0.13555400  | 1.01768300  |                                                           |
| C                     | 5.12559800  | 0.38076900  | 0.40682100  |                                                           |
| C                     | 5.41799100  | 1.64892500  | -0.08062500 |                                                           |
| C                     | 4.47422300  | 2.68633400  | 0.03247000  |                                                           |
| C                     | 3.25079600  | 2.44082500  | 0.63694600  |                                                           |
| O                     | 6.62213000  | 1.87923400  | -0.67867400 |                                                           |
| H                     | -1.73965100 | 1.21508000  | 0.67813500  |                                                           |
| H                     | -3.60052900 | 2.54606900  | 0.36475600  |                                                           |
| H                     | -5.99015700 | 1.40837100  | 0.85488800  |                                                           |
| H                     | -5.16806300 | -0.11836800 | 2.80386500  |                                                           |
| H                     | -3.07029900 | -1.25244200 | -0.49622000 |                                                           |
| H                     | -3.28411600 | 0.88122000  | -3.27411600 |                                                           |
| H                     | 1.04411100  | -1.92351900 | 0.54715500  |                                                           |
| H                     | -1.64968800 | -2.94804200 | -0.31702800 |                                                           |
| H                     | 0.62896400  | -2.53714300 | -3.49659600 |                                                           |
| H                     | 2.53234500  | -2.13017800 | -1.32471500 |                                                           |
| H                     | 0.68321400  | -4.52745000 | -1.00865500 |                                                           |
| H                     | -0.07828100 | -2.87956400 | 2.15117800  |                                                           |
| H                     | 2.05361500  | -4.69965800 | 0.87261400  |                                                           |
| H                     | 3.32101800  | -3.99960700 | -2.30229600 |                                                           |
| H                     | 0.11244200  | -0.17459100 | -3.18795600 |                                                           |
| H                     | 1.85614500  | -0.50900700 | -3.24829700 |                                                           |

|                       |             |             |             |                                                           |
|-----------------------|-------------|-------------|-------------|-----------------------------------------------------------|
| H                     | 0.38577300  | 0.00895200  | -0.87540600 |                                                           |
| H                     | -2.64865900 | 1.63383200  | 3.23055400  |                                                           |
| H                     | -2.47142800 | 0.03801000  | 4.01746400  |                                                           |
| H                     | -2.12486100 | -1.71059200 | 2.34786300  |                                                           |
| H                     | 1.92040400  | -0.96920200 | 2.65283600  |                                                           |
| H                     | 0.92096700  | 1.75686600  | 1.60188500  |                                                           |
| H                     | 3.67858700  | -0.86686400 | 1.37302200  |                                                           |
| H                     | 5.86397100  | -0.40720600 | 0.29245900  |                                                           |
| H                     | 2.51044200  | 3.23017800  | 0.72268100  |                                                           |
| H                     | 6.66350400  | 2.80988600  | -0.96613000 |                                                           |
| C                     | -5.16635800 | 2.31809000  | -1.97177400 |                                                           |
| O                     | -5.45713500 | 2.15808800  | -3.19317300 |                                                           |
| O                     | -5.71672200 | 3.15890800  | -1.20359300 |                                                           |
| O                     | 4.87716400  | 3.87880300  | -0.49481900 |                                                           |
| C                     | 3.95906900  | 4.96691200  | -0.42332800 |                                                           |
| H                     | 3.72619700  | 5.20462300  | 0.61940300  |                                                           |
| H                     | 4.46172300  | 5.81162400  | -0.89270500 |                                                           |
| H                     | 3.04025300  | 4.73012700  | -0.96893000 |                                                           |
| <b>Name</b>           |             |             |             | <b>10-FMT-DIANION</b>                                     |
| Cartesian Coordinates |             |             |             | Energy                                                    |
| C                     | 2.59840900  | -0.61333700 | 0.55749400  | Zero-point correction= 0.536929 (Hartree/Particle)        |
| C                     | 3.78278200  | -1.50084000 | 0.09594100  | Thermal correction to Energy= 0.573145                    |
| C                     | 4.92252300  | -1.07550600 | 0.99201700  | Thermal correction to Enthalpy= 0.574089                  |
| C                     | 4.50952200  | -0.31024000 | 2.00020900  | Thermal correction to Gibbs Free Energy= 0.467920         |
| C                     | 3.03486300  | 0.01014000  | 1.92766400  | Sum of electronic and zero-point Energies= -2059.782037   |
| C                     | 2.26933200  | 0.47761900  | -0.44681700 | Sum of electronic and thermal Energies= -2059.745821      |
| O                     | 2.13797700  | -0.03822000 | -1.77343900 | Sum of electronic and thermal Enthalpies= -2059.744877    |
| C                     | 3.18637200  | -0.79642700 | -2.20033200 | Sum of electronic and thermal Free Energies= -2059.851046 |
| C                     | 4.02994300  | -1.44802000 | -1.38935500 |                                                           |
| O                     | 1.02227000  | 1.00900300  | -0.09751300 |                                                           |
| C                     | -0.46193600 | 2.81800200  | 0.29439700  |                                                           |
| C                     | 0.75726000  | 2.34330100  | -0.50503000 |                                                           |
| O                     | 0.58102100  | 2.45640800  | -1.89510400 |                                                           |
| C                     | -0.71706800 | 2.19890800  | -2.46074300 |                                                           |
| C                     | -1.84006200 | 2.96144000  | -1.73111400 |                                                           |
| C                     | -1.28692900 | 3.76222500  | -0.56422100 |                                                           |
| O                     | -0.07177100 | 3.49134000  | 1.47626200  |                                                           |
| O                     | -2.38814700 | 4.27968100  | 0.16401900  |                                                           |
| O                     | -2.48724400 | 3.79403300  | -2.68570800 |                                                           |
| C                     | -1.00663600 | 0.71213700  | -2.62410900 |                                                           |
| O                     | -1.27248900 | 0.02257200  | -1.41028900 |                                                           |
| C                     | 2.27075900  | -0.64126900 | 3.08945300  |                                                           |
| O                     | 2.93098200  | 1.43452800  | 1.97963000  |                                                           |
| O                     | 0.85911600  | -0.78066900 | 2.82750000  |                                                           |
| C                     | 0.06626100  | 0.29694500  | 2.88174800  |                                                           |
| C                     | -1.28985300 | 0.09897800  | 2.42590700  |                                                           |
| C                     | -1.70184500 | -1.03277700 | 1.79359400  |                                                           |
| O                     | 0.49288100  | 1.39336400  | 3.27837800  |                                                           |
| C                     | -2.98016200 | -1.25783800 | 1.17269900  |                                                           |
| C                     | -3.96007900 | -0.25484500 | 1.04479400  |                                                           |
| C                     | -5.15332400 | -0.50596400 | 0.39346600  |                                                           |
| C                     | -5.45990500 | -1.77599400 | -0.17757500 |                                                           |
| C                     | -4.44063000 | -2.78875000 | -0.03657400 |                                                           |
| C                     | -3.24939200 | -2.53173200 | 0.60573000  |                                                           |

|   |             |             |             |
|---|-------------|-------------|-------------|
| O | -6.56548600 | -2.02080000 | -0.78724100 |
| H | 1.68890900  | -1.21279600 | 0.66298200  |
| H | 3.54696800  | -2.54751700 | 0.33774900  |
| H | 5.94050300  | -1.42122900 | 0.83971900  |
| H | 5.12224900  | 0.08609900  | 2.80530800  |
| H | 3.03524100  | 1.26241100  | -0.47744800 |
| H | 3.24207500  | -0.83771600 | -3.28312400 |
| H | -1.08568400 | 1.94839500  | 0.54628700  |
| H | 1.62916600  | 2.96367800  | -0.27290400 |
| H | -0.64067600 | 2.61821000  | -3.46853300 |
| H | -2.56885000 | 2.24758900  | -1.32161300 |
| H | -0.65950500 | 4.58563600  | -0.93514100 |
| H | 0.04390600  | 2.82999200  | 2.18851900  |
| H | -2.03647300 | 4.72036600  | 0.95653500  |
| H | -3.29489000 | 4.14681600  | -2.27701500 |
| H | -0.17458800 | 0.24381500  | -3.16290200 |
| H | -1.90975900 | 0.61794000  | -3.23542900 |
| H | -0.46564600 | 0.04353600  | -0.86005400 |
| H | 2.61020700  | -1.67040800 | 3.21495300  |
| H | 2.42629300  | -0.08515300 | 4.01829200  |
| H | 2.07529100  | 1.67611900  | 2.38183800  |
| H | -1.92942800 | 0.96873900  | 2.54321000  |
| H | -0.99272200 | -1.85781500 | 1.72074900  |
| H | -3.77732400 | 0.73864800  | 1.44791100  |
| H | -5.90081700 | 0.27725300  | 0.29181400  |
| H | -2.48945400 | -3.30358700 | 0.69199700  |
| C | 5.11432500  | -2.30037200 | -1.99498600 |
| O | 5.40547600  | -2.13034800 | -3.21505400 |
| O | 5.66236500  | -3.14991100 | -1.23477400 |
| O | -4.77468600 | -3.99869900 | -0.59936300 |
| C | -3.81759200 | -5.04197600 | -0.49856000 |
| H | -3.60935300 | -5.28353000 | 0.54992100  |
| H | -4.26090500 | -5.90742700 | -0.99169400 |
| H | -2.88449700 | -4.76918600 | -1.00453000 |



## References

1. M. G. Evans and M. Polanyi, *Trans. Faraday Soc.*, 1935, **31**, 875-894.
2. H. Eyring, *J. Chem. Phys.*, 1935, **3**, 107-115.
3. D. G. Truhlar, W. L. Hase and J. T. Hynes, *J. Phys. Chem.*, 1983, **87**, 2664-2682.
4. T. Furuncuoglu, I. Ugur, I. Degirmenci and V. Aviyente, *Macromolecules*, 2010, **43**, 1823-1835.
5. E. Vélez, J. Quijano, R. Notario, E. Pabón, J. Murillo, J. Leal, E. Zapata and G. Alarcón, *J. Phys. Org. Chem.*, 2009, **22**, 971-977.
6. E. Pollak and P. Pechukas, *J. Am. Chem. Soc.*, 1978, **100**, 2984-2991.
7. A. Fernández-Ramos, B. A. Ellingson, R. Meana-Pañeda, J. M. Marques and D. G. Truhlar, *Theor. Chem. Acc.*, 2007, **118**, 813-826.
8. C. Eckart, *Phy. Rev.*, 1930, **35**, 1303.
9. R. A. Marcus, *Annu. Rev. Phys. Chem.*, 1964, **15**, 155-196.
10. R. A. Marcus, *Rev. Mod. Phys.*, 1993, **65**, 599.
11. Y. Lu, A. Wang, P. Shi and H. Zhang, *PloS one*, 2017, **12**, e0169773.
12. Y. Lu, A. Wang, P. Shi, H. Zhang and Z. Li, *PloS one*, 2015, **10**, e0133259.
13. S. F. Nelsen, S. C. Blackstock and Y. Kim, *J. Am. Chem. Soc.*, 1987, **109**, 677-682.
14. S. F. Nelsen, M. N. Weaver, Y. Luo, J. R. Pladziewicz, L. K. Ausman, T. L. Jentzsch and J. J. O'Konek, *J. Phys. Chem. A*, 2006, **110**, 11665-11676.
15. A. Galano and J. R. Alvarez-Idaboy, *J. Comput. Chem.*, 2013, **34**, 2430-2445.
16. F. C. Collins and G. E. Kimball, *J. Colloid Sci.*, 1949, **4**, 425-437.
17. M. Von Smoluchowski, *Z. Phys. Chem*, 1917, **92**, 129-168.
18. D. G. Truhlar, *J. Chem. Educ.*, 1985, **62**, 104.
19. A. Einstein, *Ann. Phys.*, 1905, **17**, 549-560.
20. G. G. Stokes, *Mathematical and Physical Papers*, University Press, Cambridge, 1905.
21. A. Galano and J. Raúl Alvarez-Idaboy, *Int. J. Quantum Chem.*, 2019, **119**, e25665.
22. Q. V. Vo, T. V. Gon, M. V. Bay and A. Mechler, *J. Phys. Chem. B*, 2019, **123**, 10672-10679.
23. Q. V. Vo and A. Mechler, *J. Chem. Inf. Model.*, 2020, **60**, 316-321.
24. Y. Okuno, *Chem.: Eur. J.*, 1997, **3**, 212-218.
25. S. Benson, *The foundations of chemical kinetics:*, Malabar, Florida, 1982.
26. C. Iuga, J. R. Alvarez-Idaboy and A. Vivier-Bunge, *J. Phys. Chem. B*, 2011, **115**, 12234-12246.
27. J. R. Alvarez-Idaboy, L. Reyes and N. Mora-Diez, *Org. Biomol. Chem.*, 2007, **5**, 3682-3689.
28. T. H. Le, T. T. Tran and L. K. Huynh, *Chemom. Intell. Lab. Syst.*, 2018, **172**, 10-16.
29. E. Dzib, J. L. Cabellos, F. Ortíz-Chi, S. Pan, A. Galano and G. Merino, *Int. J. Quantum Chem.*, 2019, **119**, e25686.

30. E. Dzib, J. L. Cabellos, F. Ortiz-Chi, S. Pan, A. Galano and G. Merino, *Eyringpy 1.0.2*, 2018, Cinvestav, Mérida, Yucatán.
